# Supplementary material for: Deep eutectic solvent-based green absorbents for the effective removal of volatile organochlorine compounds from biogas
Source: Royal Society of Chemistry journal article supplement (doi:10.1039/d1gc01735g), 2021-01-01
Supplement: d1gc01735g1.pdf [file d1gc01735g1.pdf]

*Electronic Supplementary Information (ESI)*

---

**Deep eutectic solvents – based green absorbents for effective volatile organochlorine compounds  
removal from biogas**

**Patrycja Makoś-Chełstowska <sup>1\*</sup>, Edyta Słupek <sup>1</sup>, Jacek Gębicki <sup>1</sup>**

<sup>1</sup>Department of Process Engineering and Chemical Technology, Faculty of Chemistry, Gdansk University of Technology, G. Narutowicza St. 11/12, 80–233 Gdańsk, Poland; edyta.slupek@pg.edu.pl (E.S.); jacek.gebicki@pg.edu.pl (J.G.)

\*Correspondence: patrycja.makos@pg.edu.pl; Tel.: +48-508-997-100

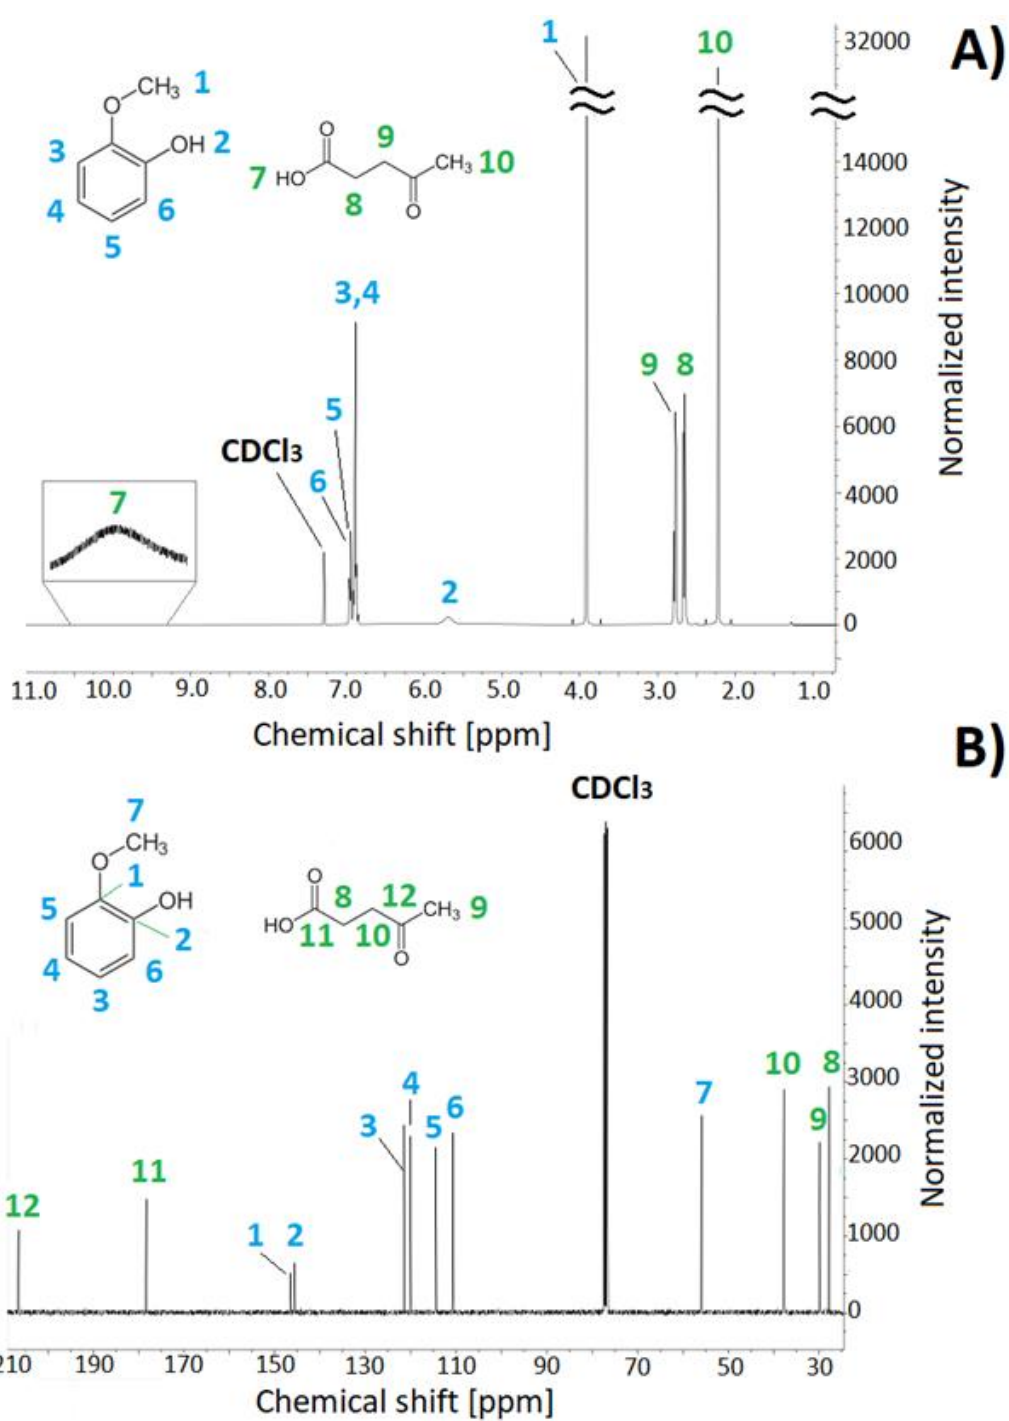

**Figure S1** A)  $^1\text{H}$  NMR spectra of Gu:Lev (1:1), B)  $^{13}\text{C}$  NMR spectra of Gu:Lev (1:1).

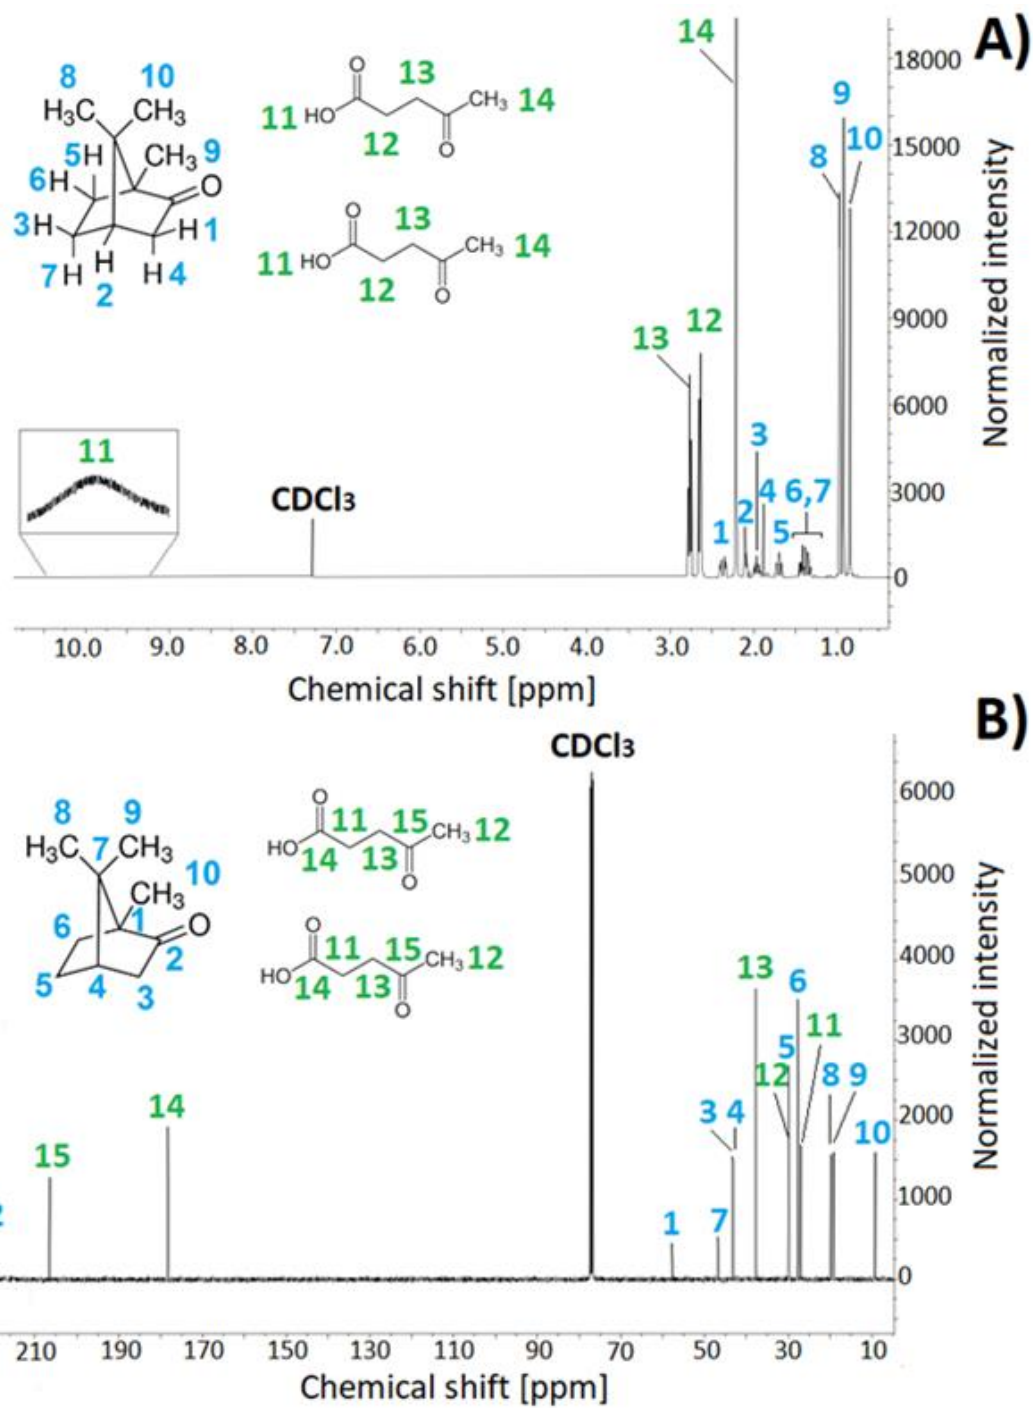

Figure S2 A)  $^1\text{H}$  NMR spectra of C:Lev (1:2), B)  $^{13}\text{C}$  NMR spectra of C:Lev (1:2).

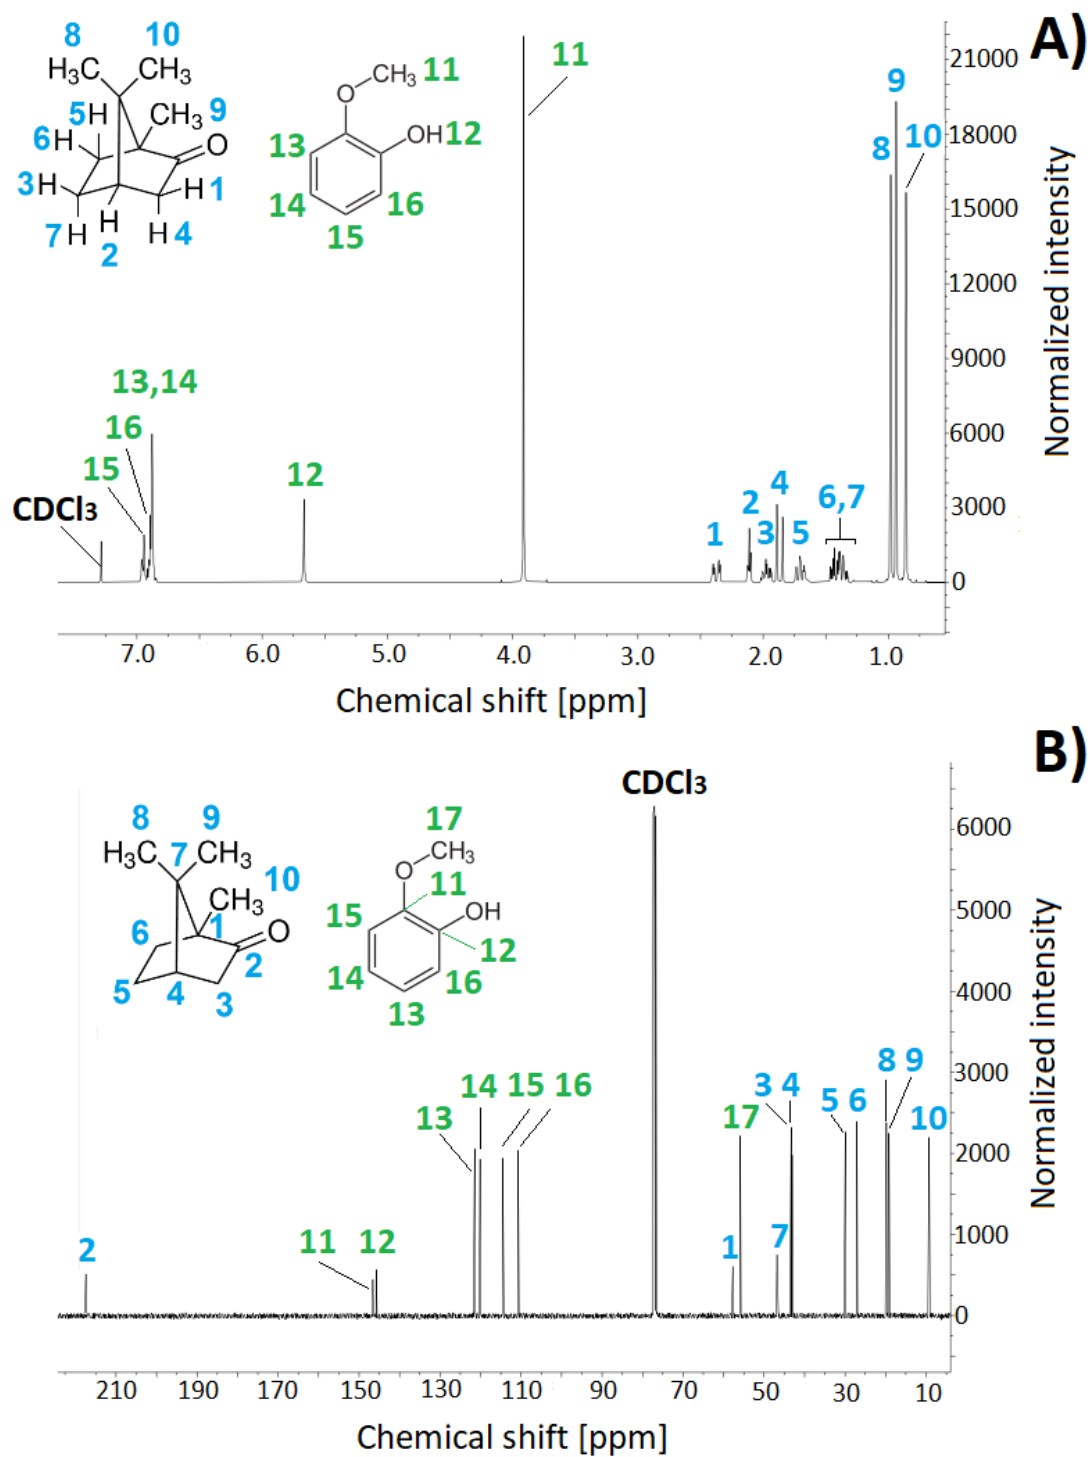

Figure S3 A)  $^1\text{H}$  NMR spectra of C:Gu (1:1), B)  $^{13}\text{C}$  NMR spectra of C:Gu (1:1).

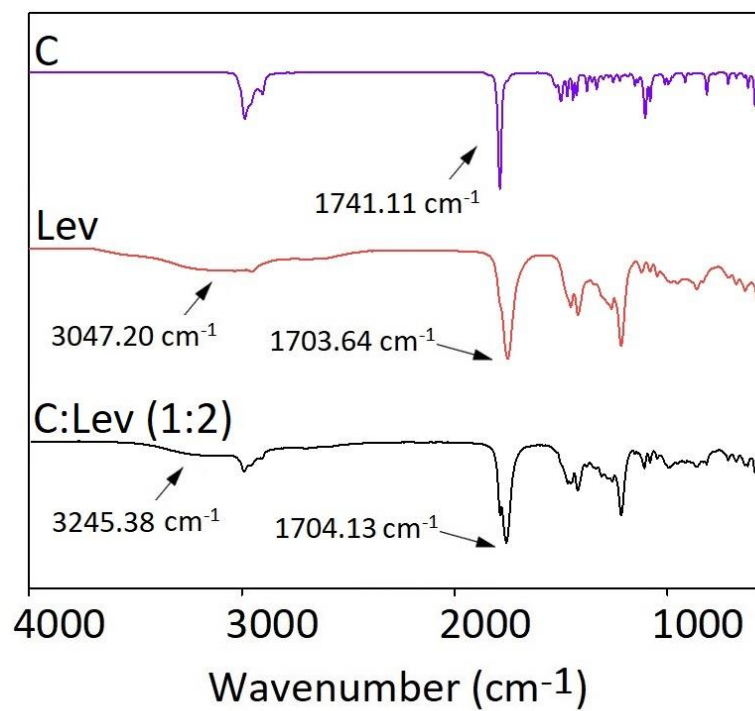

Figure S4 FT-IR spectrum for pure C, Lev, and C:Lev (1:2).

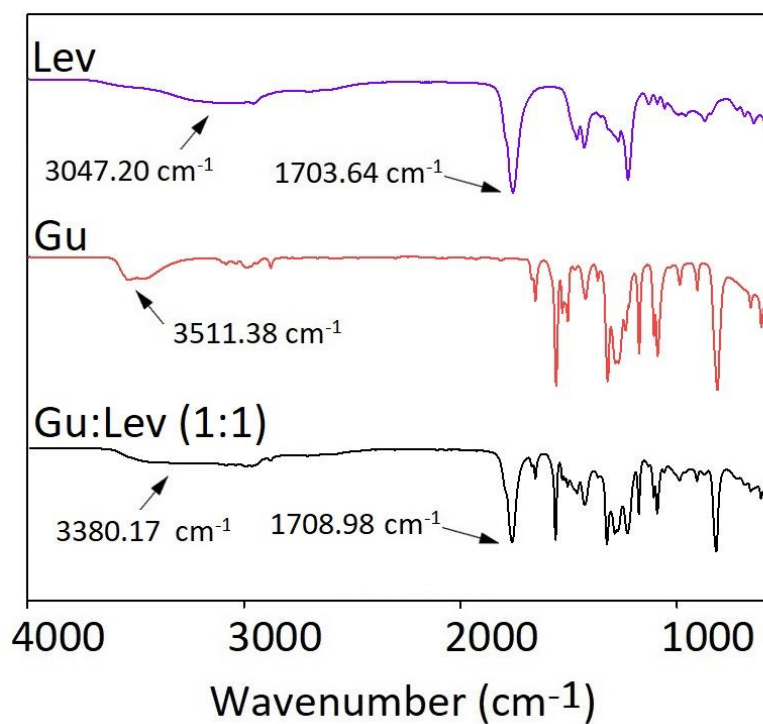

Figure S5 FT-IR spectrum for pure Lev, Gu, and Gu:Lev (1:1).

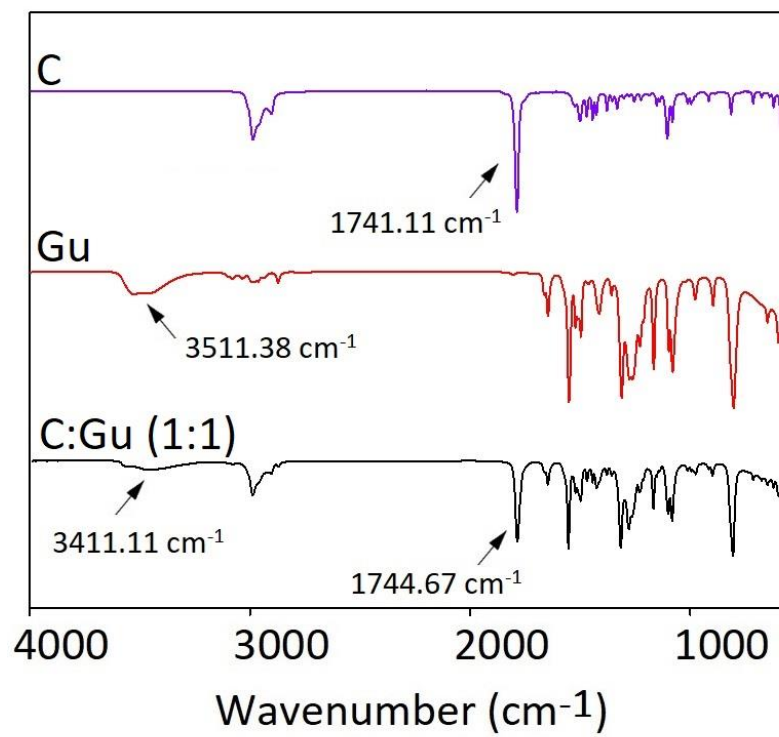

**Figure S6** FT-IR spectrum for pure C, Gu, and C:Gu (1:1).

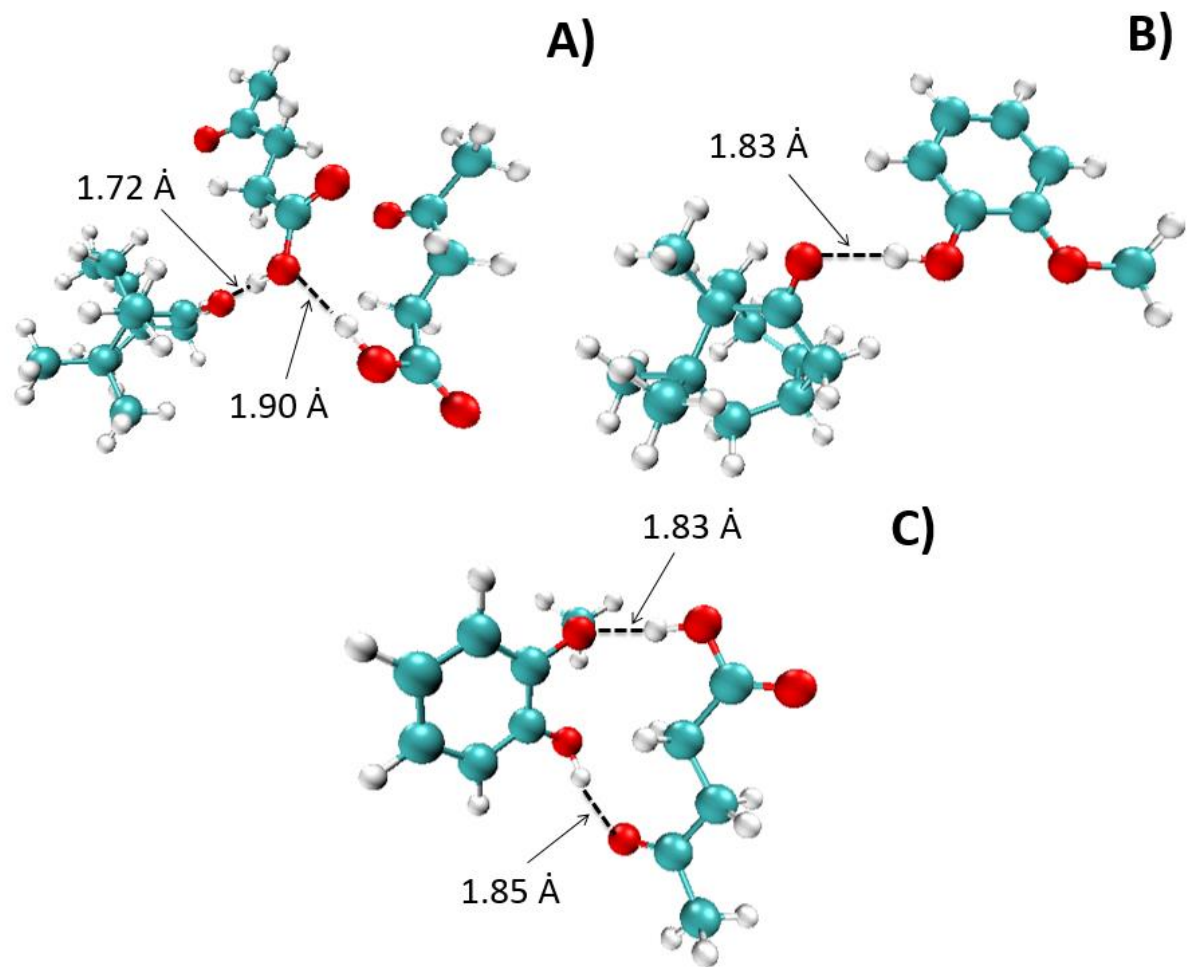

**Figure S7** The structures of DEs after geometric optimization: A) C:Lev (1:2); B) C:Gu (1:1); C) Gu:Lev (1:1).

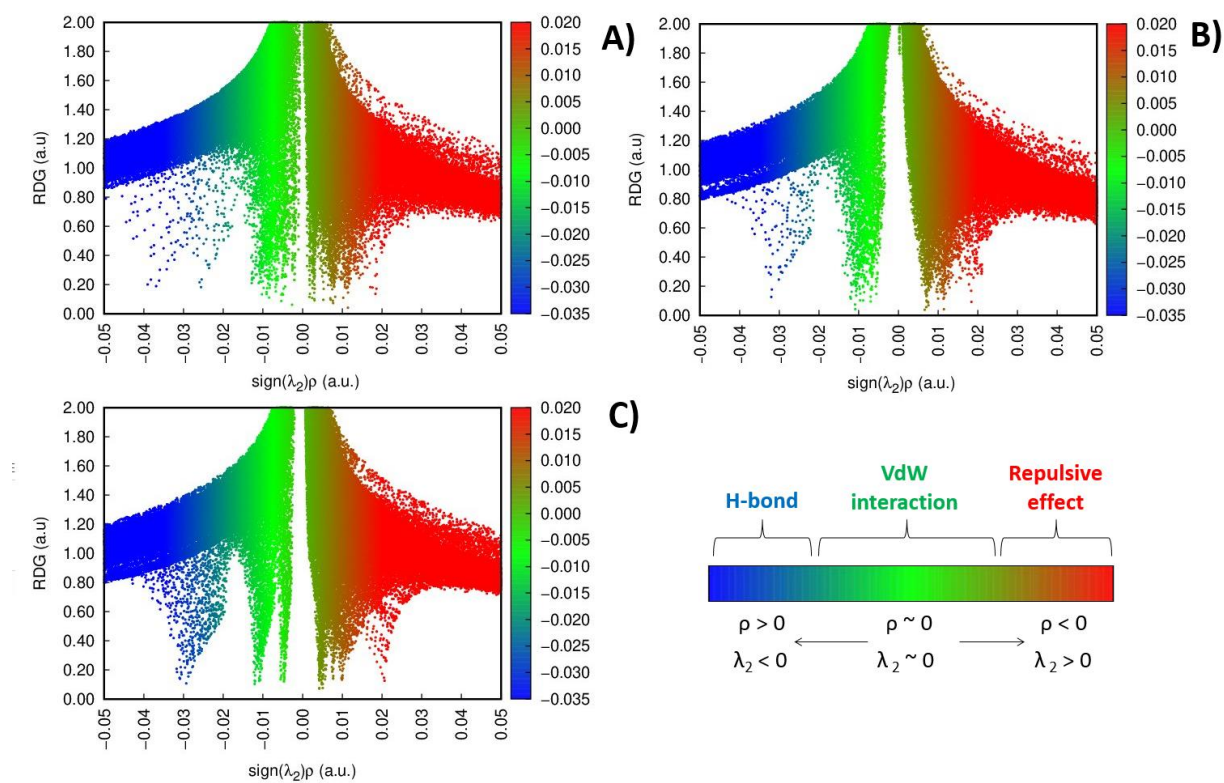

**Figure S8** 2D plots of RDG versus the electron density multiplied by the sign of the second Hessian eigenvalue for: A) C:Lev (1:2); B) C:Gu (1:1); C) Gu:Lev (1:1). The red area represents repulsive effects; blue area - H-bonding; green area - van der Waals interactions.



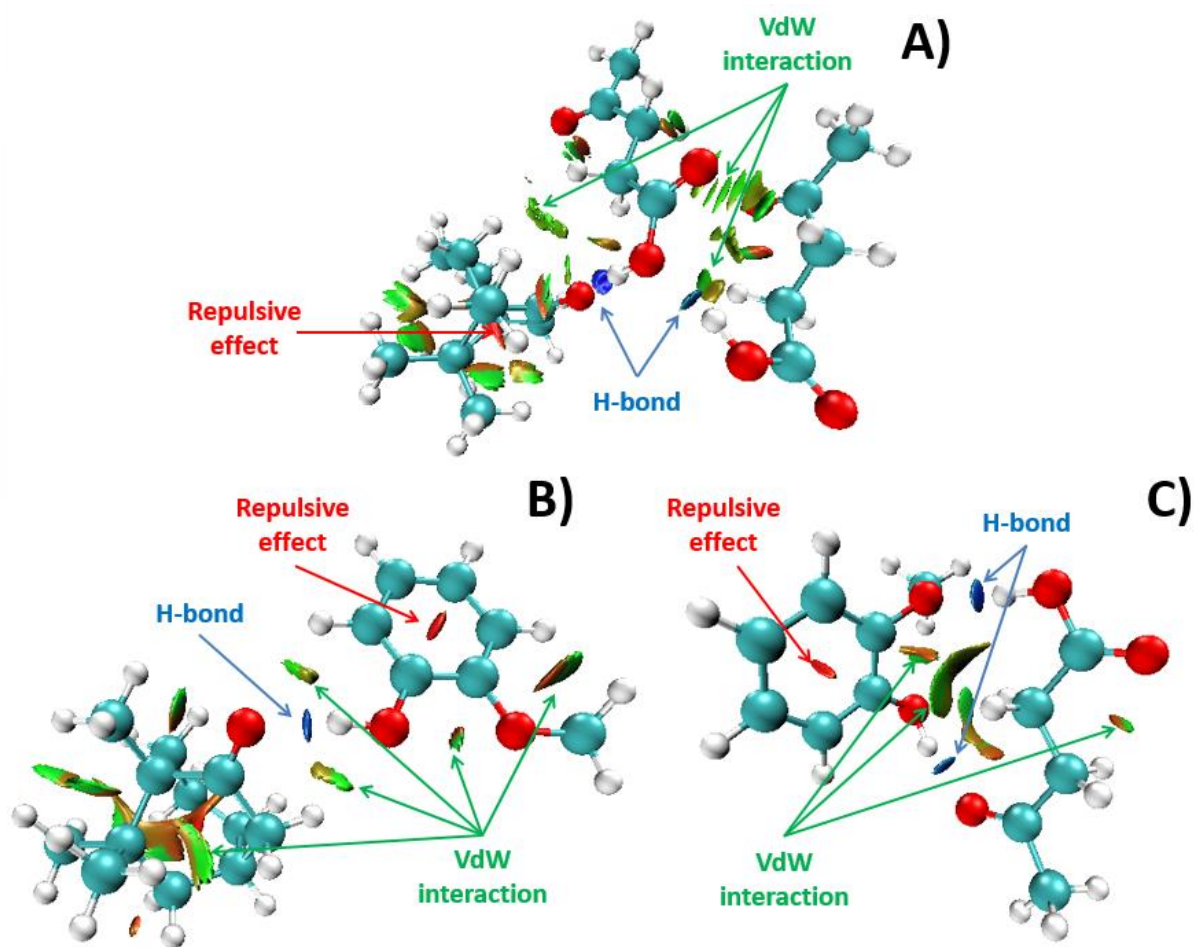

**Figure S9** Reduced density gradient (RDG) isosurfaces ( $s=0.5$  a.u.) of studied DESs: A) C:Lev (1:2); B) C:Gu (1:1); C) Gu:Lev (1:1). The red area represents repulsive effects; blue area - H-bonding; green area - van der Waals interactions.

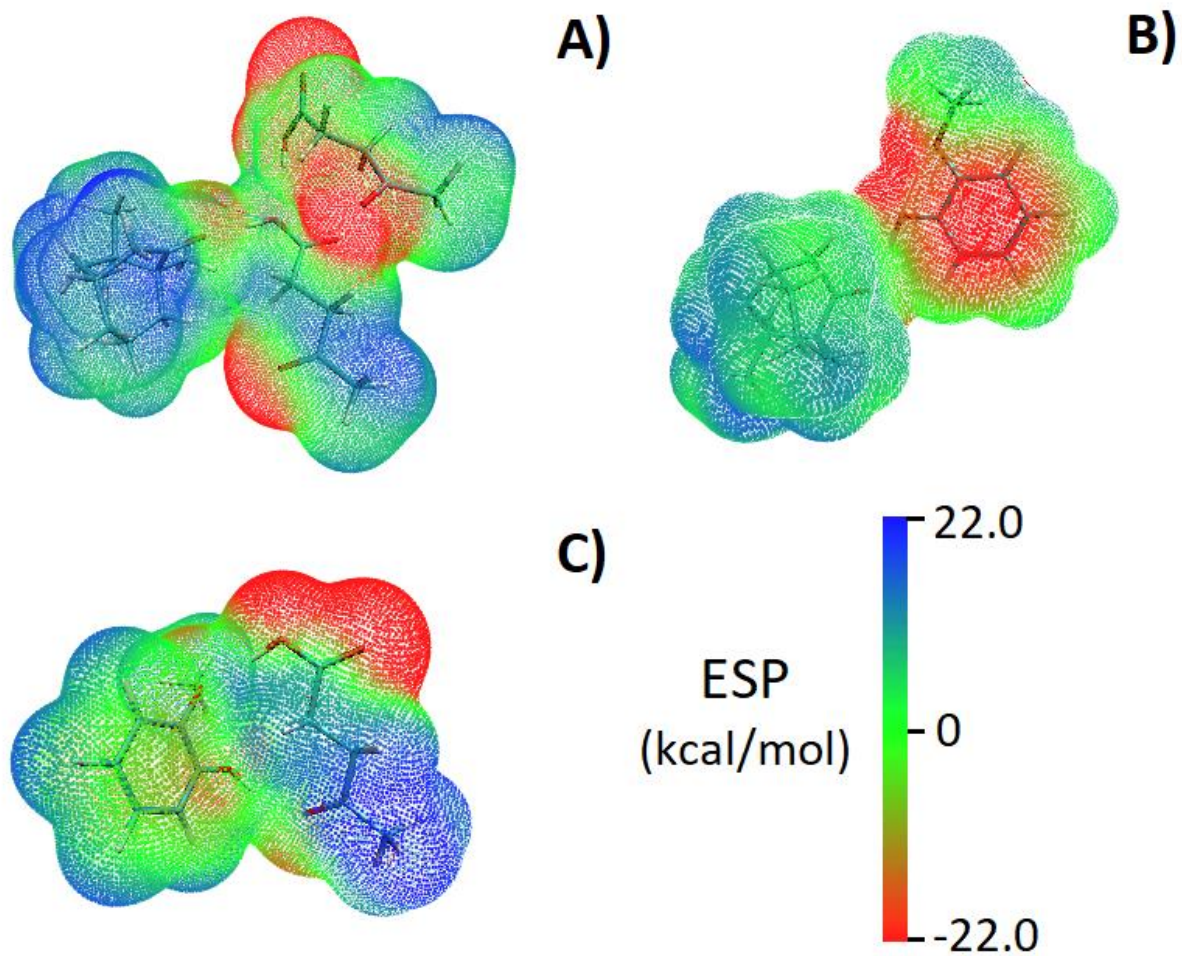

**Figure S10** Electrostatic potential (ESP) mapped on electron total density with an isovalue 0.001 for: A) C:Lev (1:2); B) C:Gu (1:1); C) Gu:Lev (1:1). Blue area are positively charged; red regions are negatively charged; green are neutrally charged.

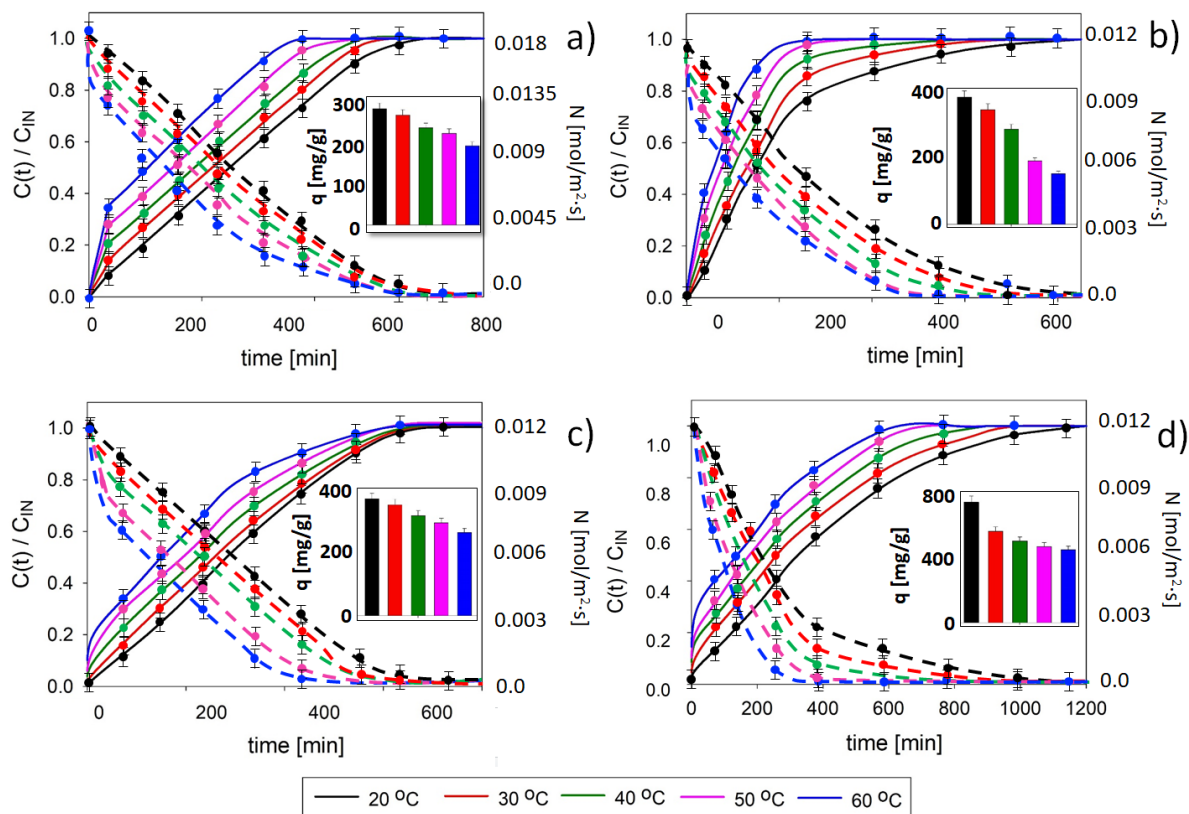

**Figure S11** Experimental breakthrough curves of a) CF; b) TCM; c) TCE; d) TCtOH at different temperatures for Syr:Lev (1:1) (inlet VOX concentration  $0.5 \text{ mg/cm}^3$ ; gas flow  $50 \text{ mL/min}$ ; matrix gas  $N_2$ ).

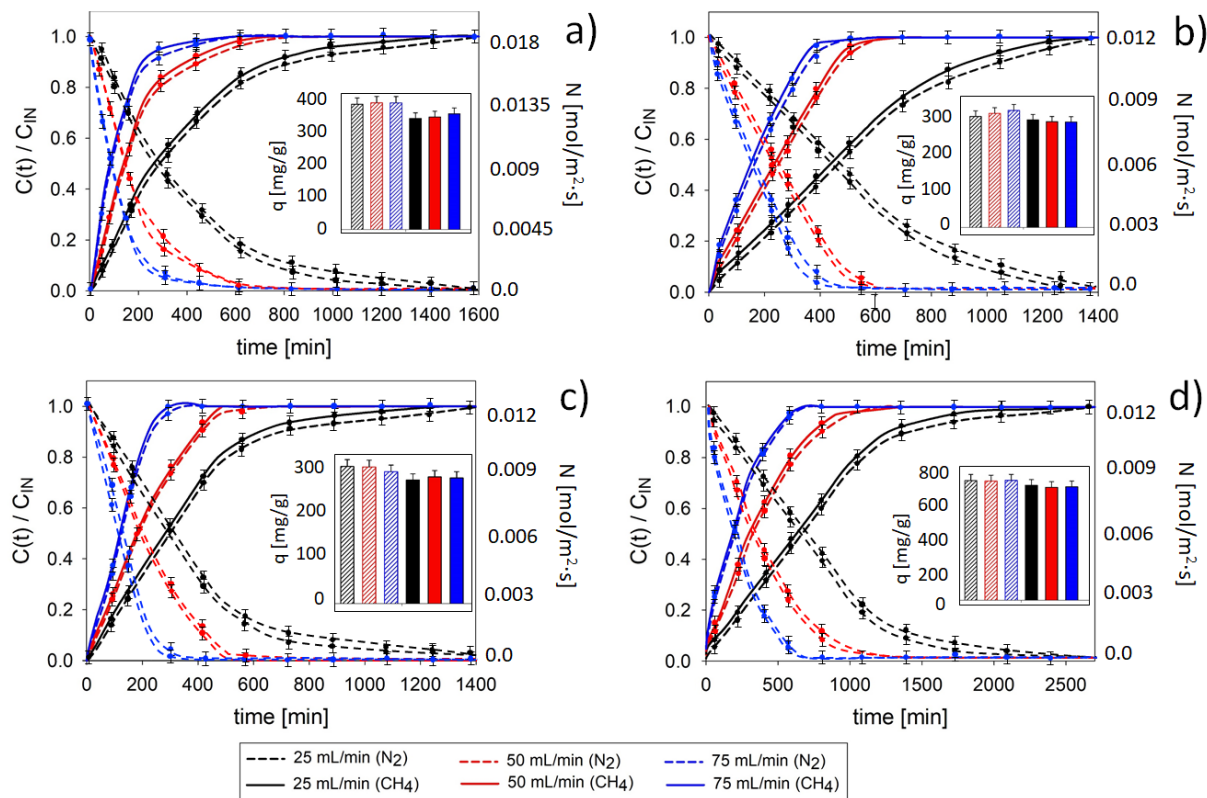

**Figure S12** Experimental breakthrough curves of a) CF; b) TCM; c) TCE; d) TCtOH at different gas flow rate for Syr:Lev (1:1) (inlet VOX concentration  $0.5 \text{ mg/cm}^3$ ; temperature  $20^\circ\text{C}$ ).

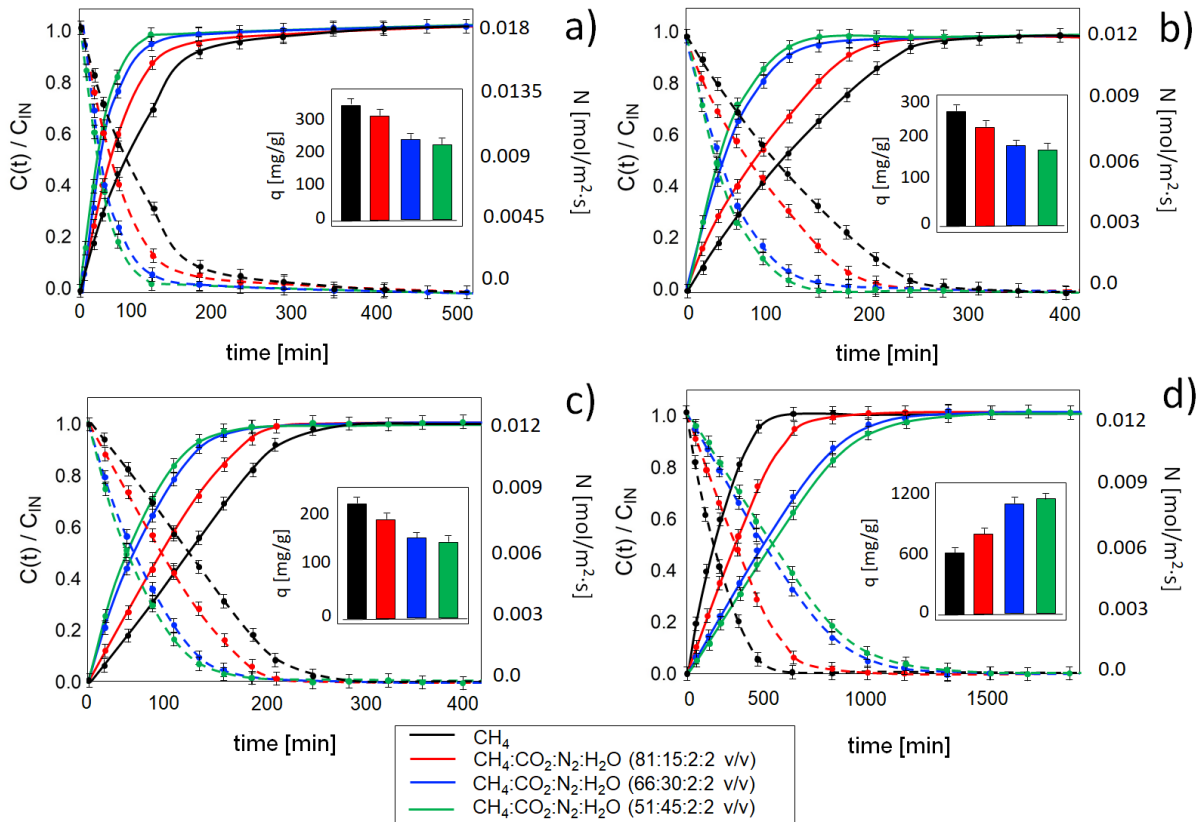

**Figure S13** Experimental breakthrough curves of a) CF; b) TCM; c) TCE; d) TCeOH at different gas matrix (inlet VOX concentration  $0.5 \text{ mg/cm}^3$ ; gas flow  $50 \text{ mL/min}$ ; temperature  $20^\circ\text{C}$ ).

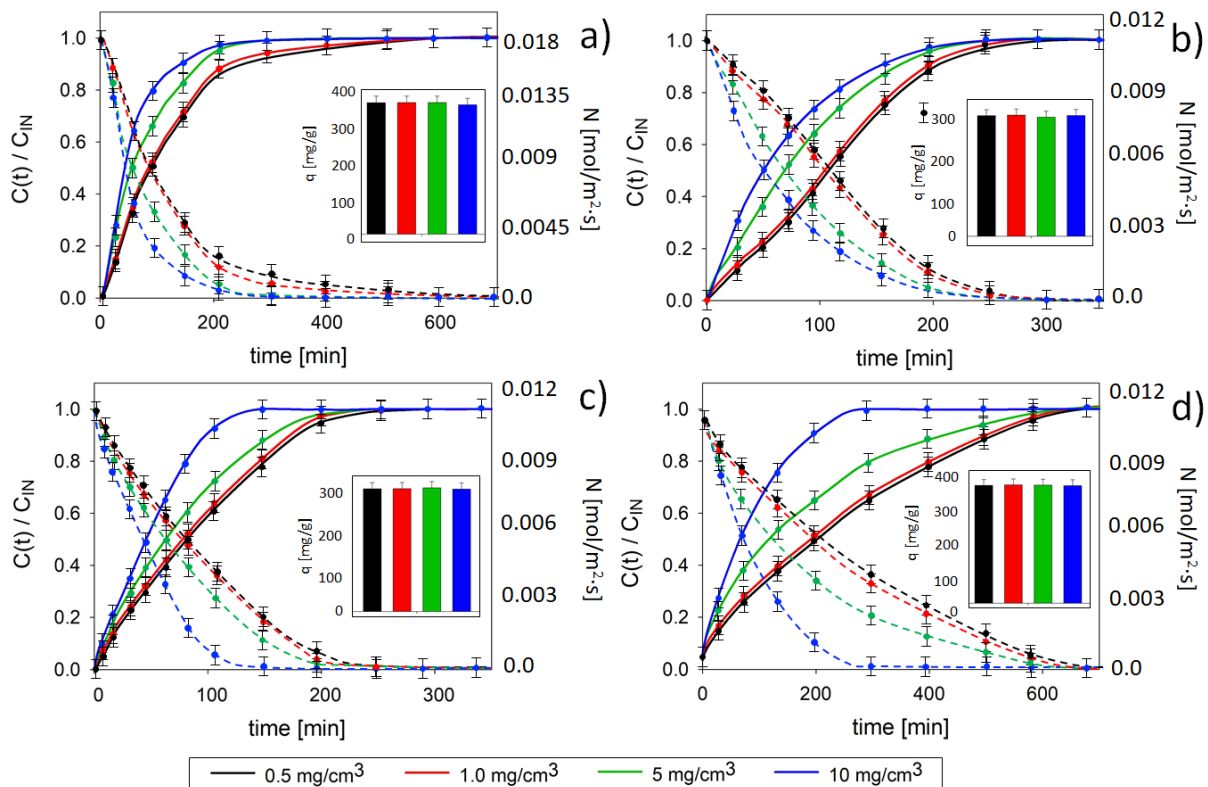

**Figure S14** Experimental breakthrough curves of a) CF; b) TCM; c) TCE; d) TCeOH at different initial concentration for Syr:Lev (1:1) (gas flow  $70 \text{ mL/min}$ ; matrix gas  $\text{N}_2$ ; temperature  $20^\circ\text{C}$ ).

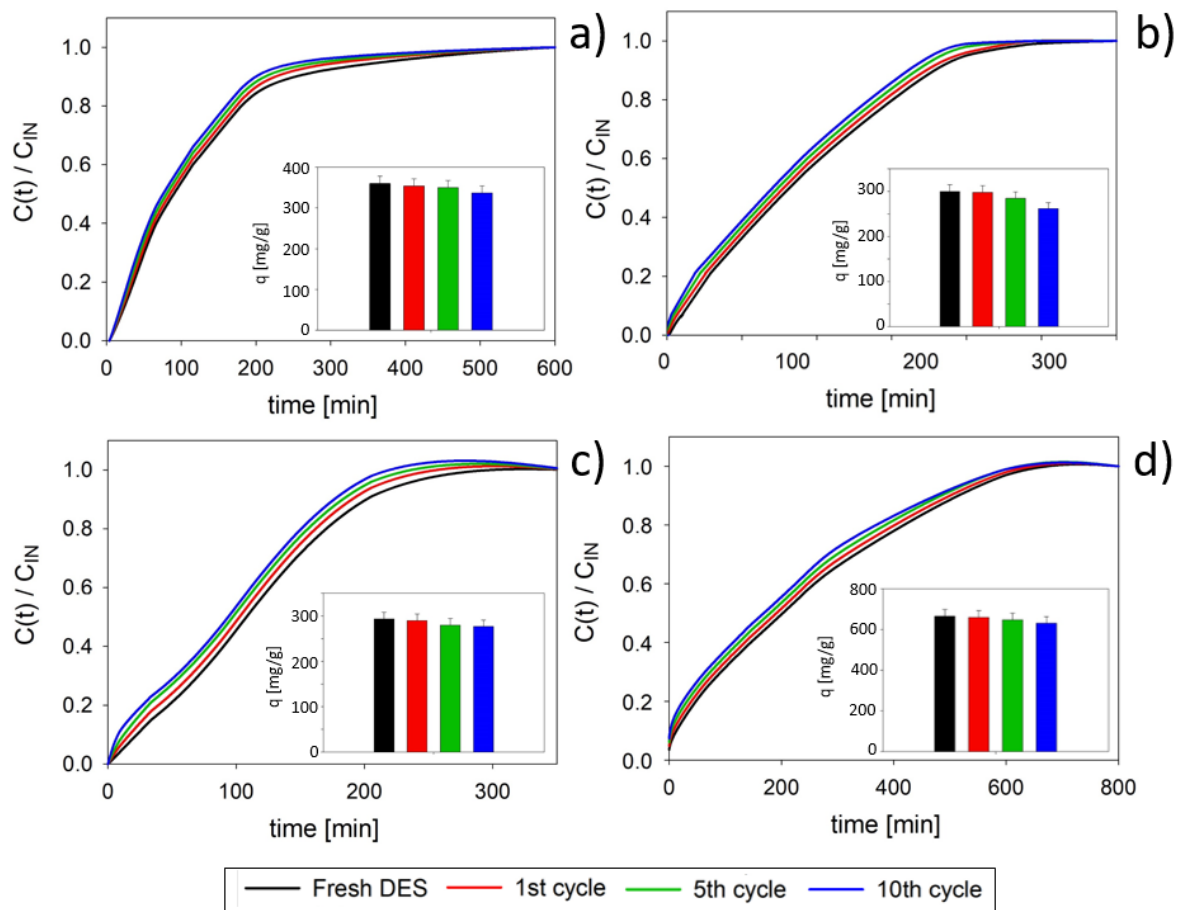

**Figure S15** Experimental breakthrough curves of a) CF; b) TCM; c) TCE; d) TCeTOH after absorption/desorption cycles of Syr:Lev (1:1) (gas flow 70 mL/min; matrix gas  $N_2$ ; temperature 20°C).

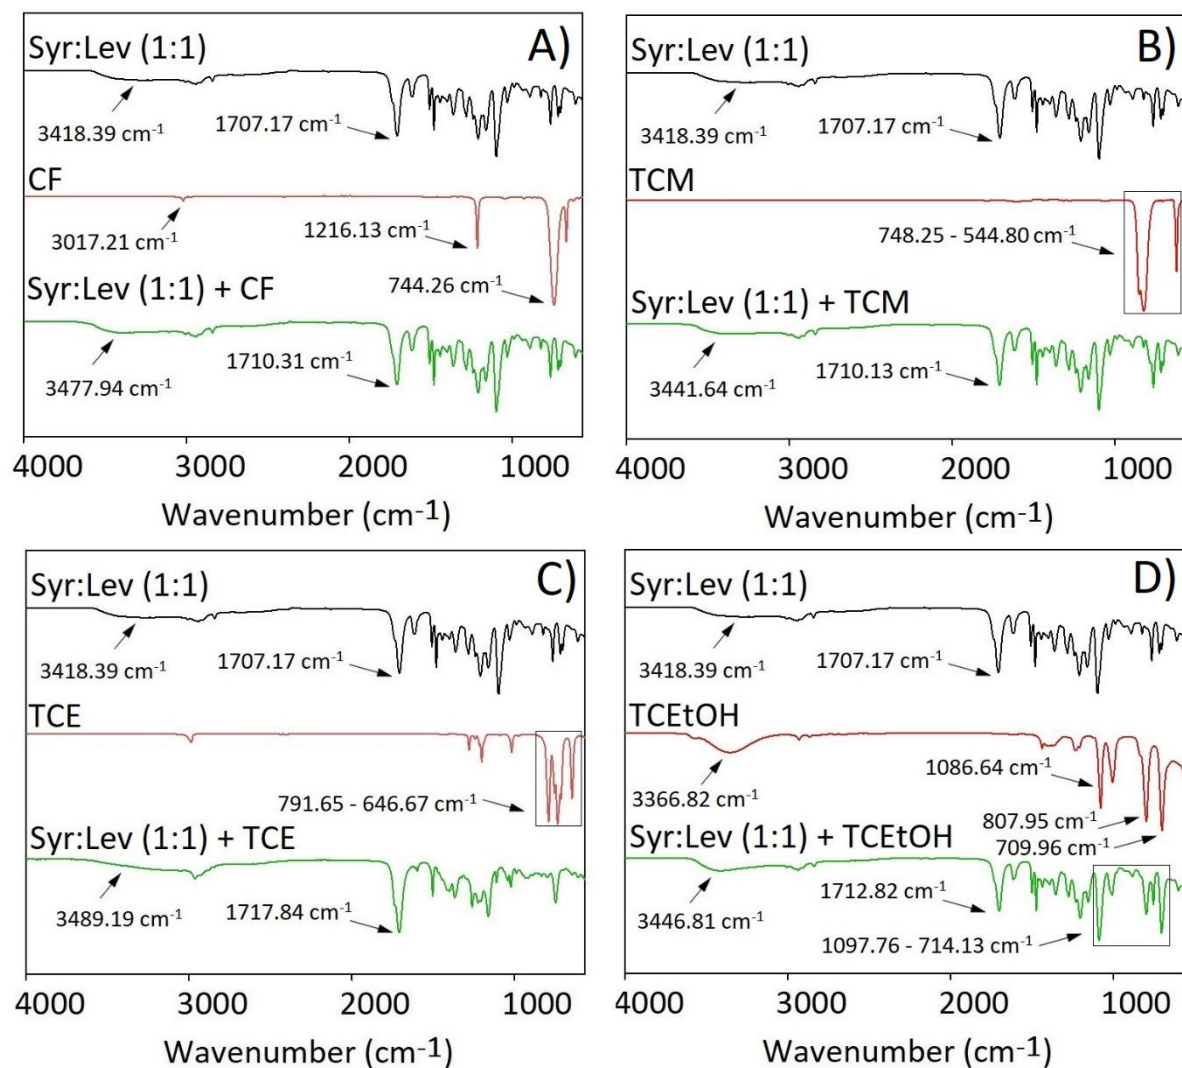

**Figure S16** FT-IR spectra of pure Syr:Lev (1:1), pure VOXs, and Syr:Lev (1:1) – VOX complexes: A) Syr:Lev (1:1) – CF; B) Syr:Lev (1:1) – TCM; C) Syr:Lev (1:1) – TCE; D) Syr:Lev (1:1) – TCeOH.

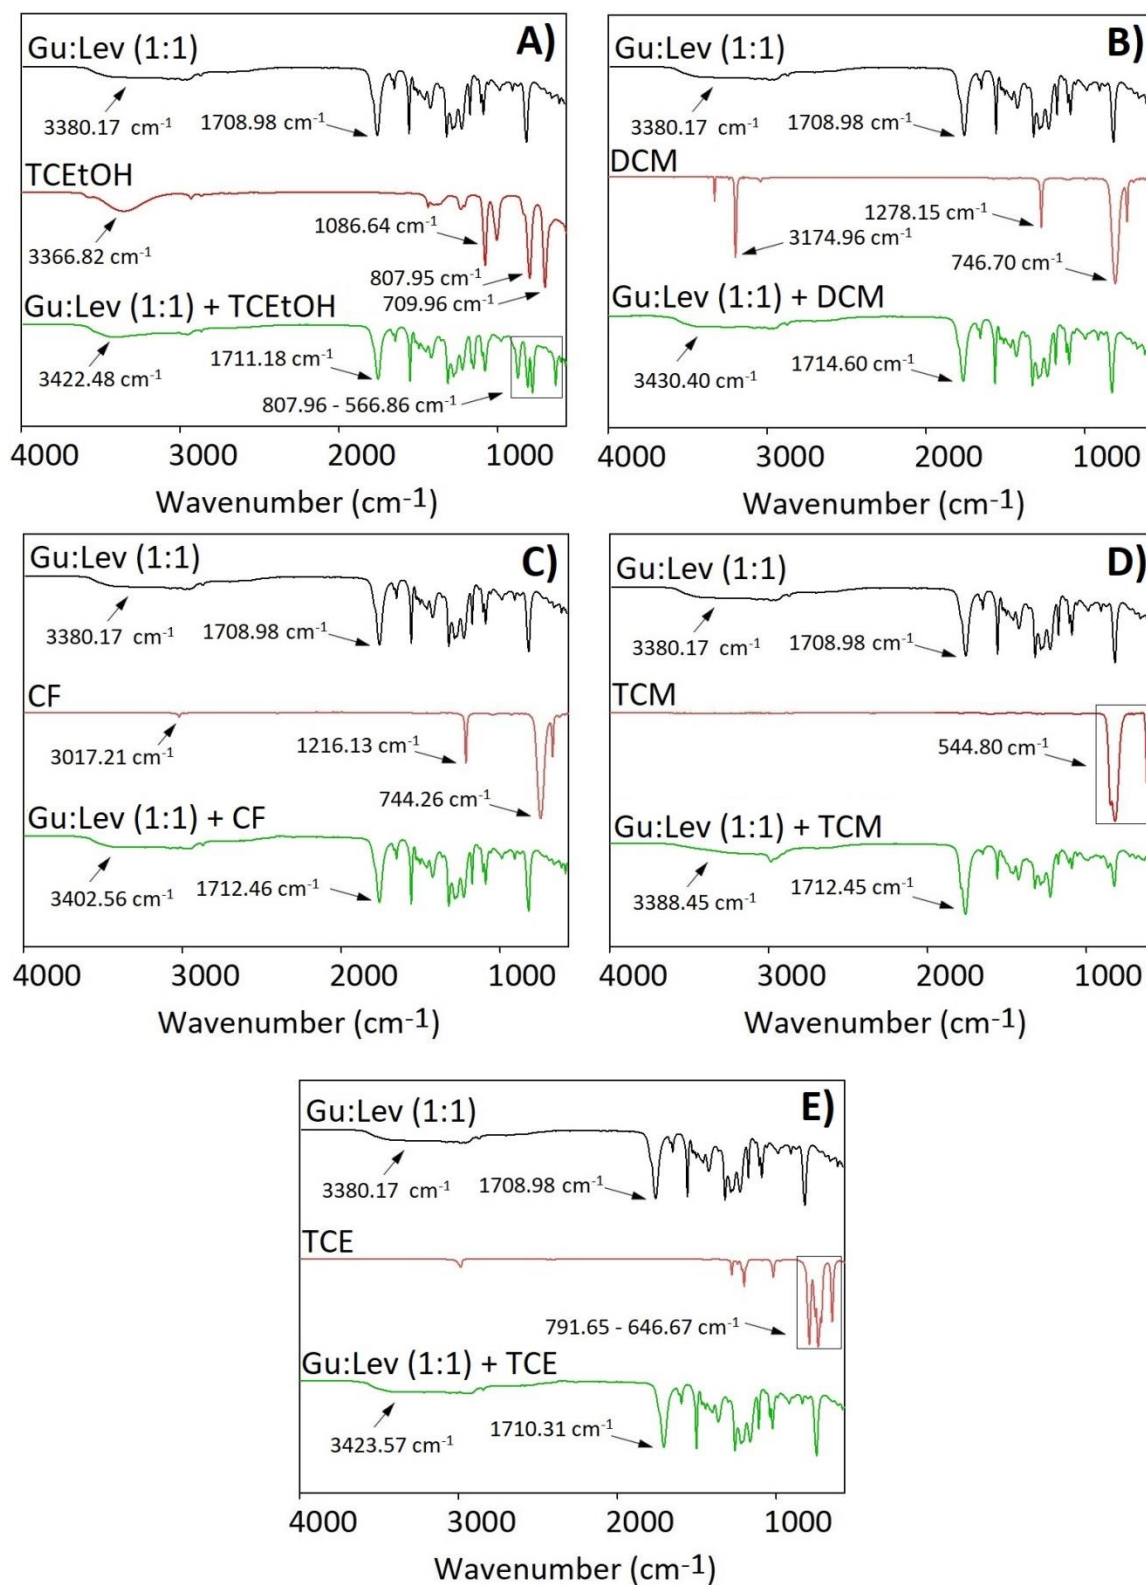

**Figure S17** FT-IR spectra of pure Gu:Lev (1:1), pure VOXs, and Gu:Lev (1:1) – VOX complexes: A) Gu:Lev (1:1) - TCEtOH; B) Gu:Lev (1:1) - DCM; C) Gu:Lev (1:1) - CF; D) Gu:Lev (1:1) - TCM; E) Gu:Lev (1:1) – TCE.

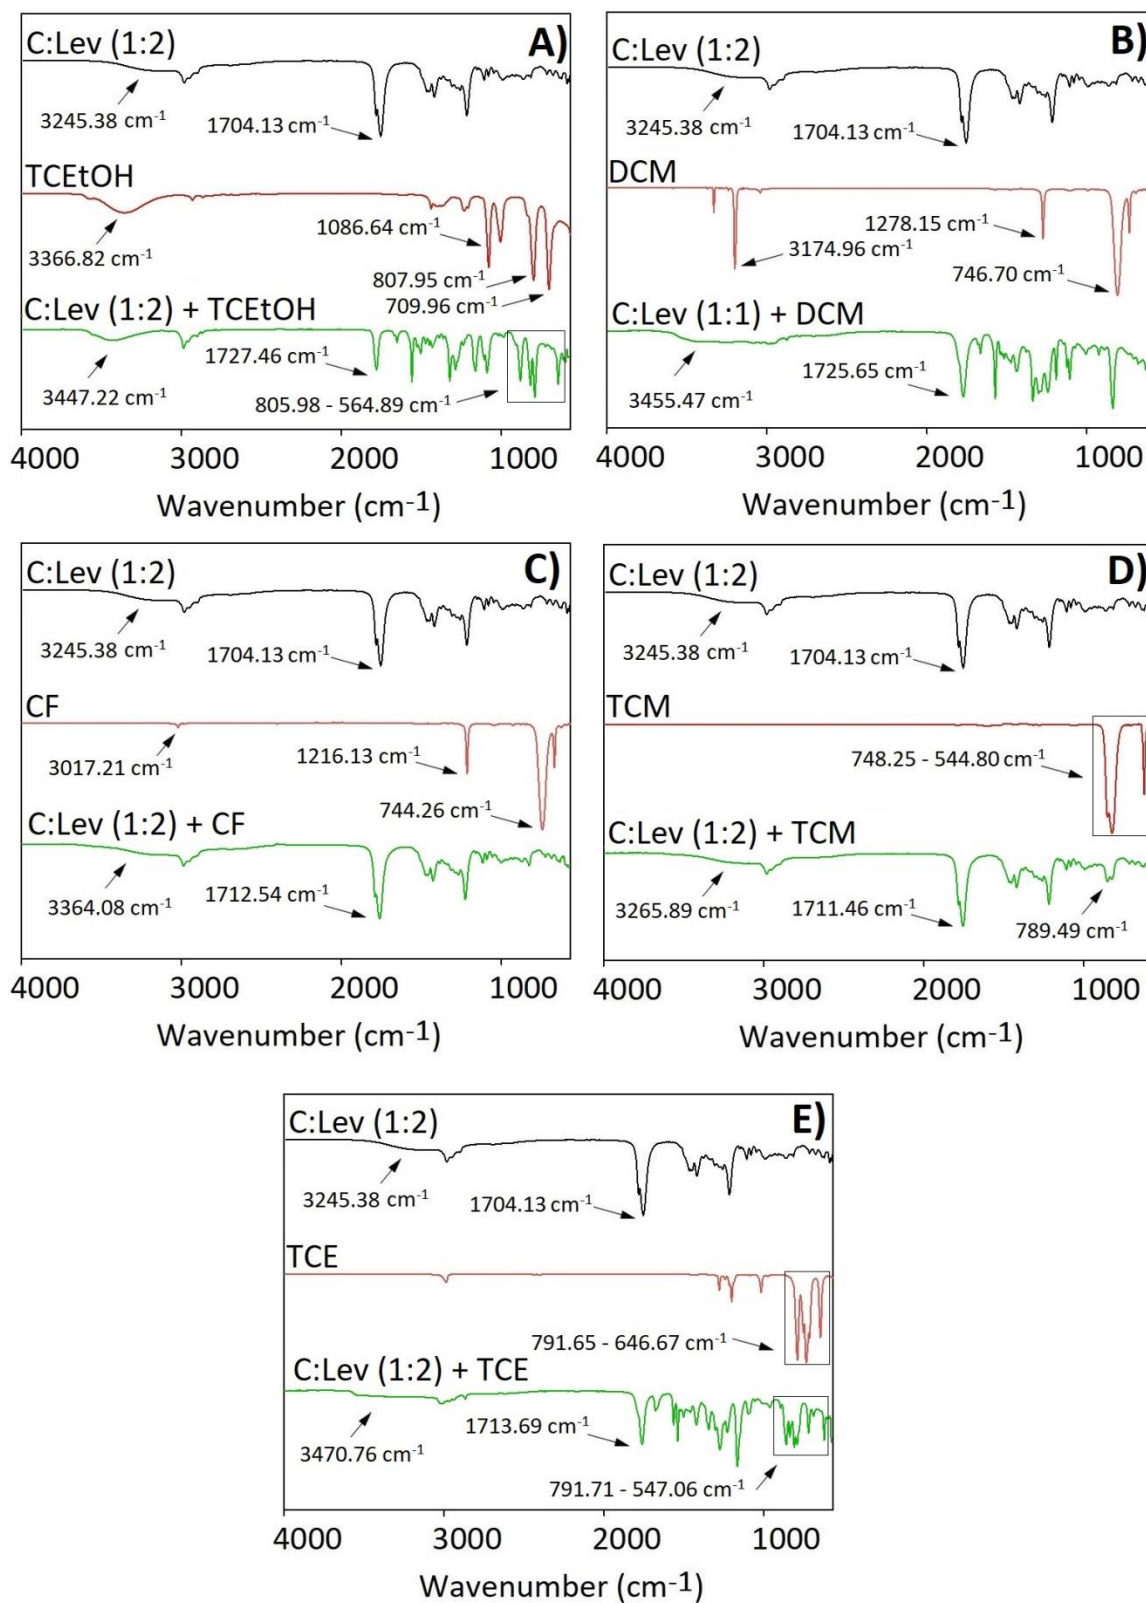

**Figure S18** FT-IR spectra of pure C:Lev (1:2), pure VOXs, and C:Lev (1:2) – VOX complexes: A) C:Lev (1:2) – TCeOH; B) C:Lev (1:2) – DCM; C) C:Lev (1:2) – CF; D) C:Lev (1:2) – TCM; E) C:Lev (1:2) – TCE.



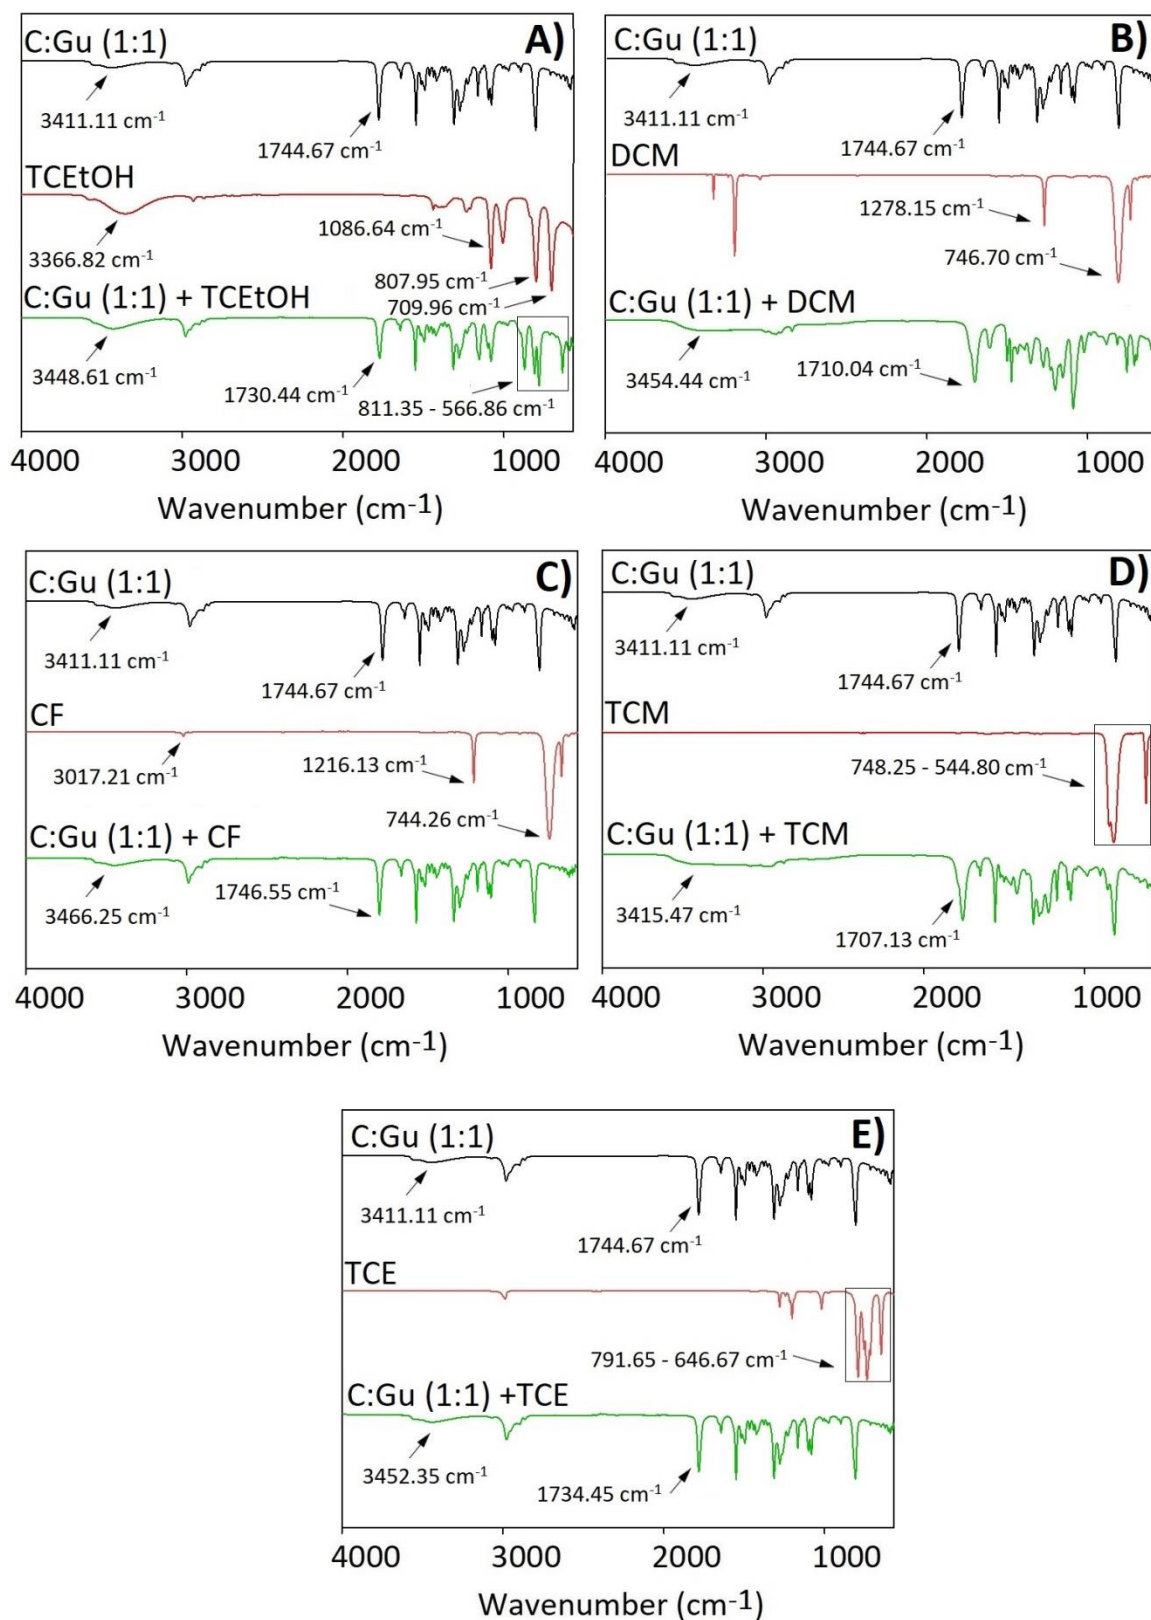

**Figure S19** FT-IR spectra of pure C:Gu (1:1), pure VOXs, and C:Gu (1:1) – VOX complexes: A) C:Gu (1:1) - TCeOH; B) C:Gu (1:1) - DCM; C) C:Gu (1:1) - CF; D) C:Gu (1:1) - TCM; E) C:Gu (1:1) – TCE.

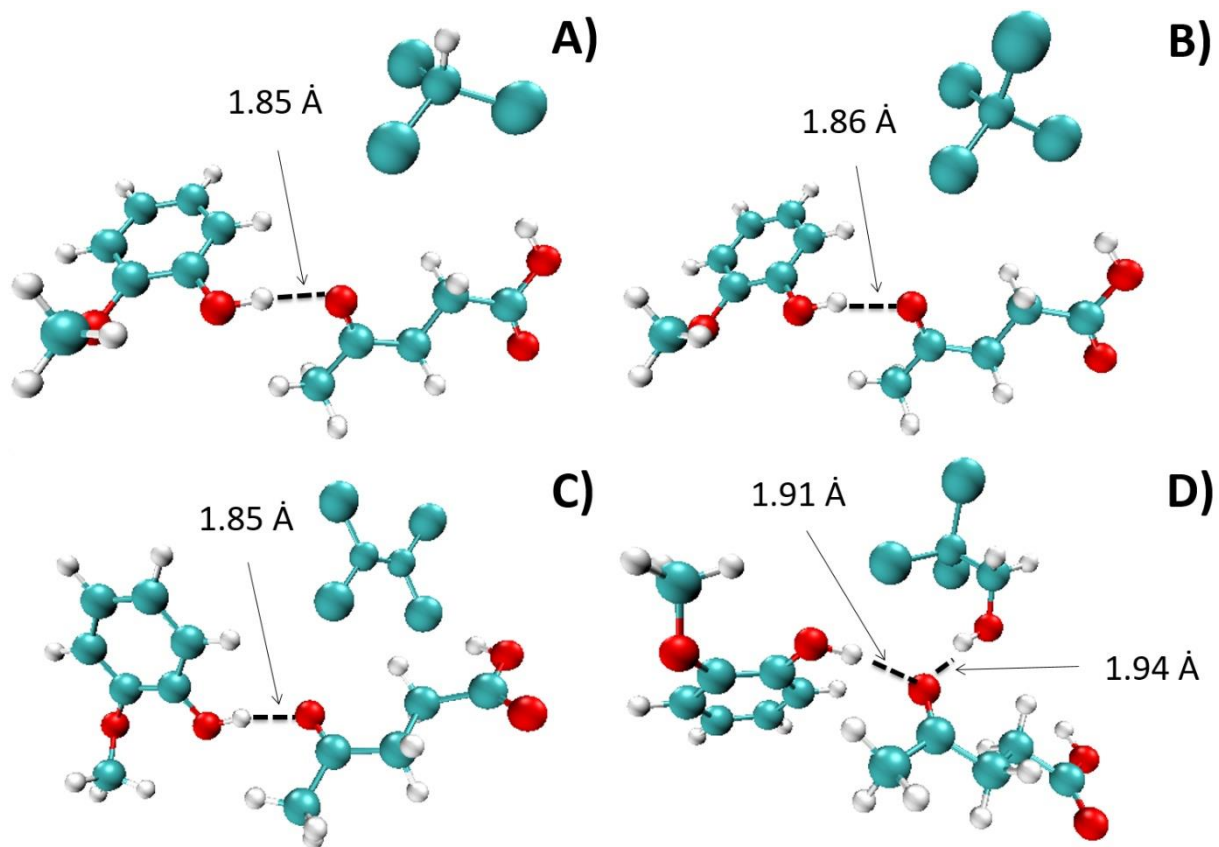

**Figure S20** The structures of Syr:Lev (1:1) - VOX complexes after geometric optimization: a) A) Syr:Lev (1:1) - CF; B) Syr:Lev (1:1) - TCM; C) Syr:Lev (1:1) - TCE; D) Syr:Lev (1:1) - TCeOH.

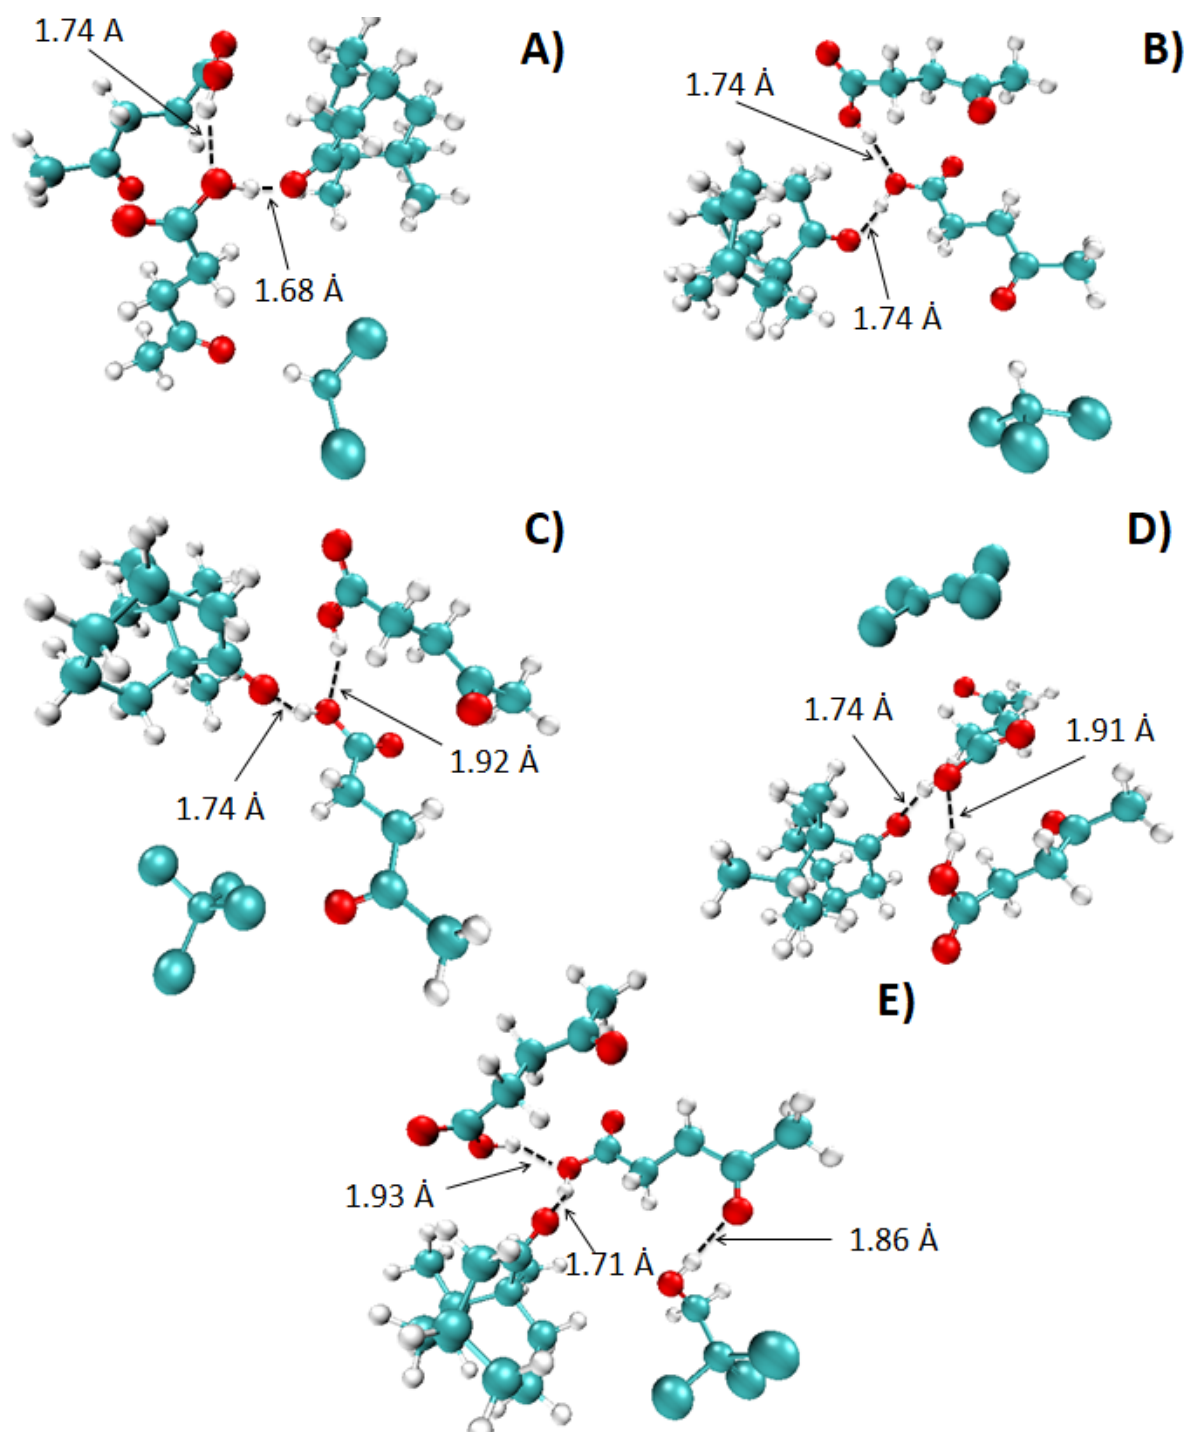

**Figure S21** The structures of C:Lev (1:2) – VOX complexes after geometric optimization: A) C:Lev (1:2) – DCM; B) C:Lev (1:2)– CF; C) C:Lev (1:2) – TCM; D) C:Lev (1:2) – TCE; E) C:Lev (1:2) – TCtEtOH.

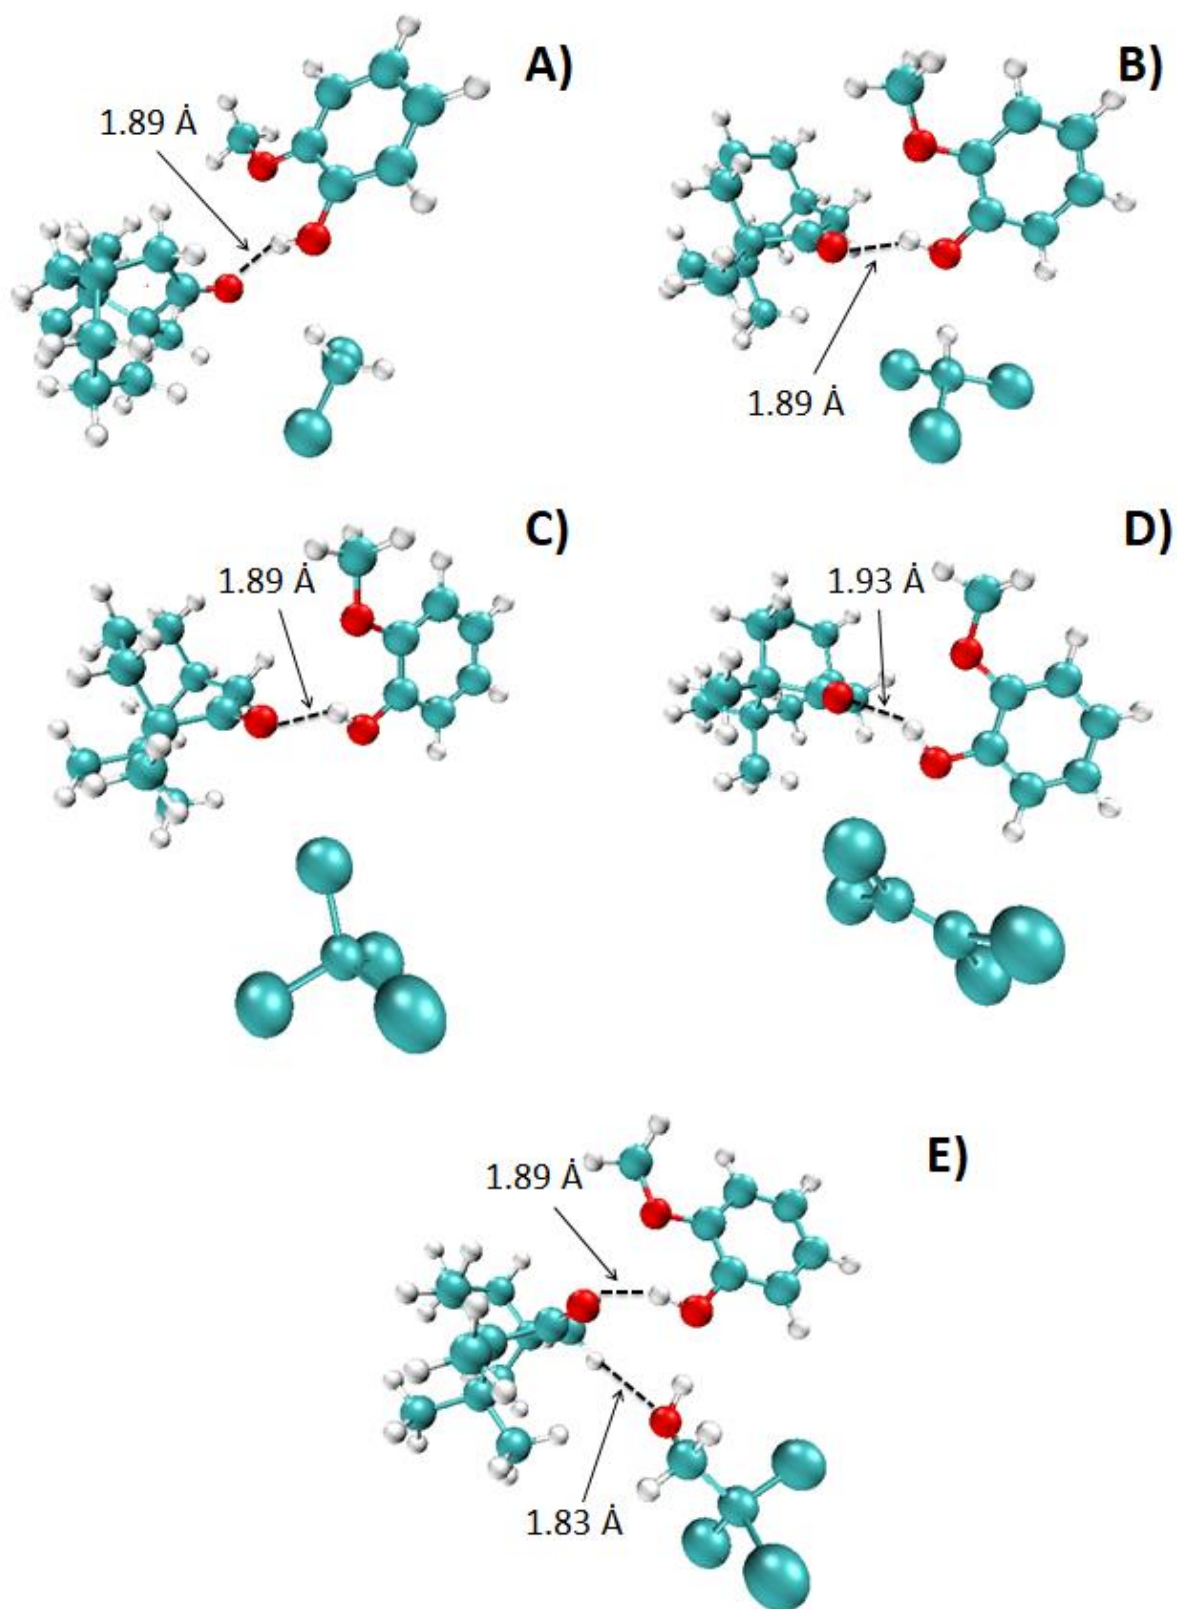

**Figure S22** The structures of C:Gu (1:1) – VOX complexes after geometric optimization: A) C:Gu (1:1) – DCM; B) C:Gu (1:1) – CF; C) C:Gu (1:1) – TCM; D) C:Gu (1:1) – TCE; E) C:Gu (1:1) – TCeOH.

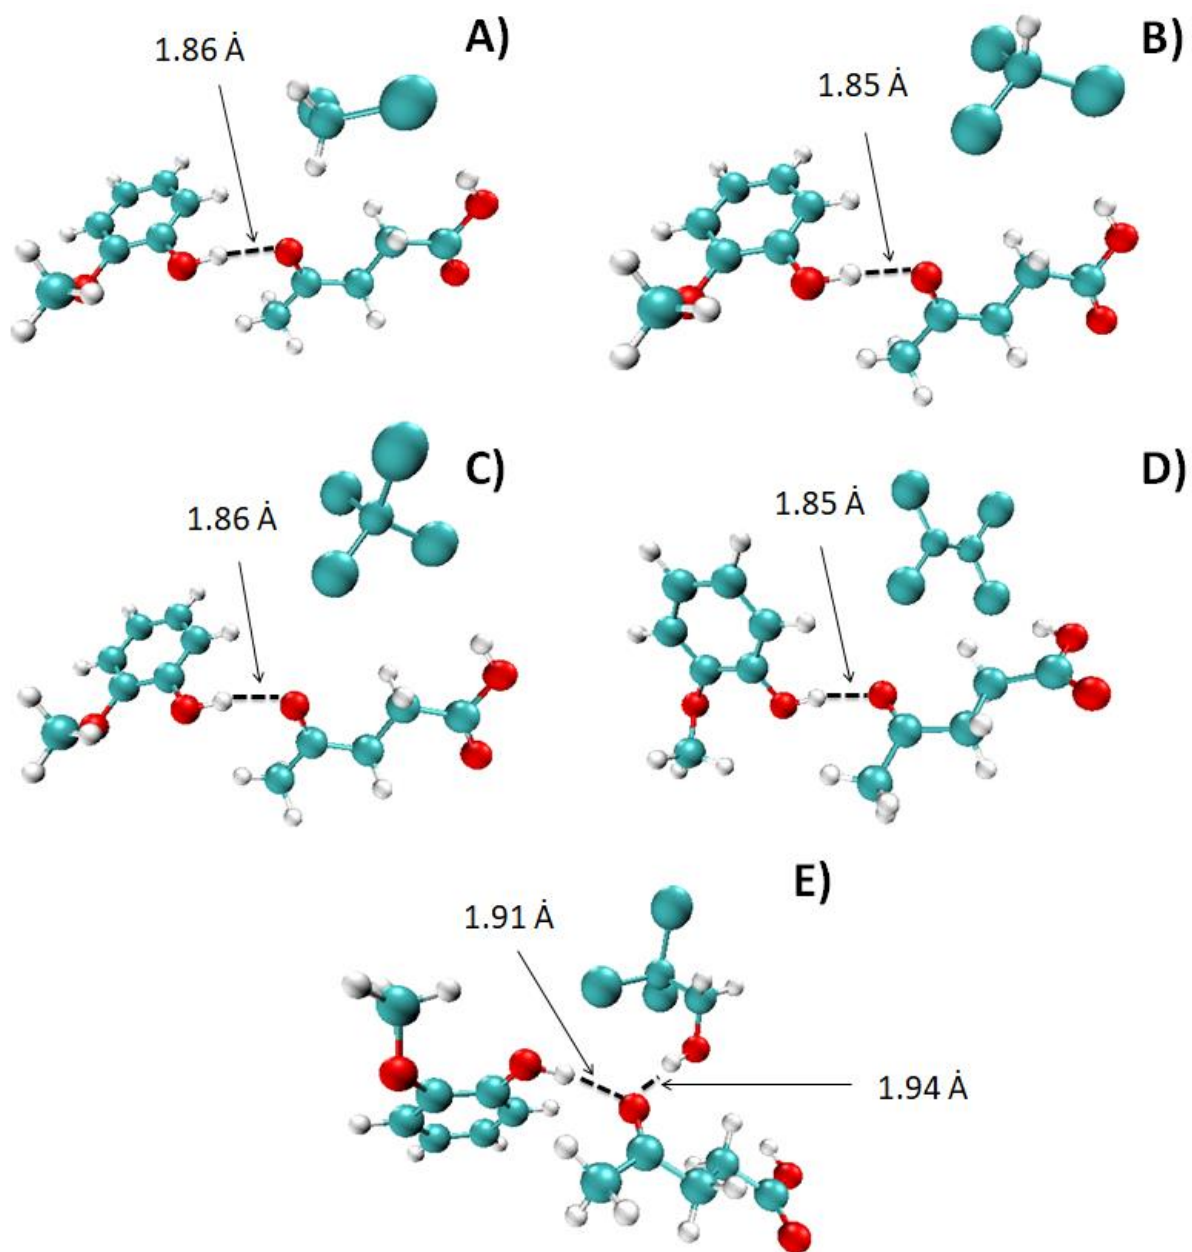

**Figure S23** The structures of Gu:Lev (1:1) – VOX complexes after geometric optimization: A) Gu:Lev (1:1) – DCM; B) Gu:Lev (1:1) – CF; C) Gu:Lev (1:1) – TCM; D) Gu:Lev (1:1) – TCE; E) Gu:Lev (1:1) – TCeOH.

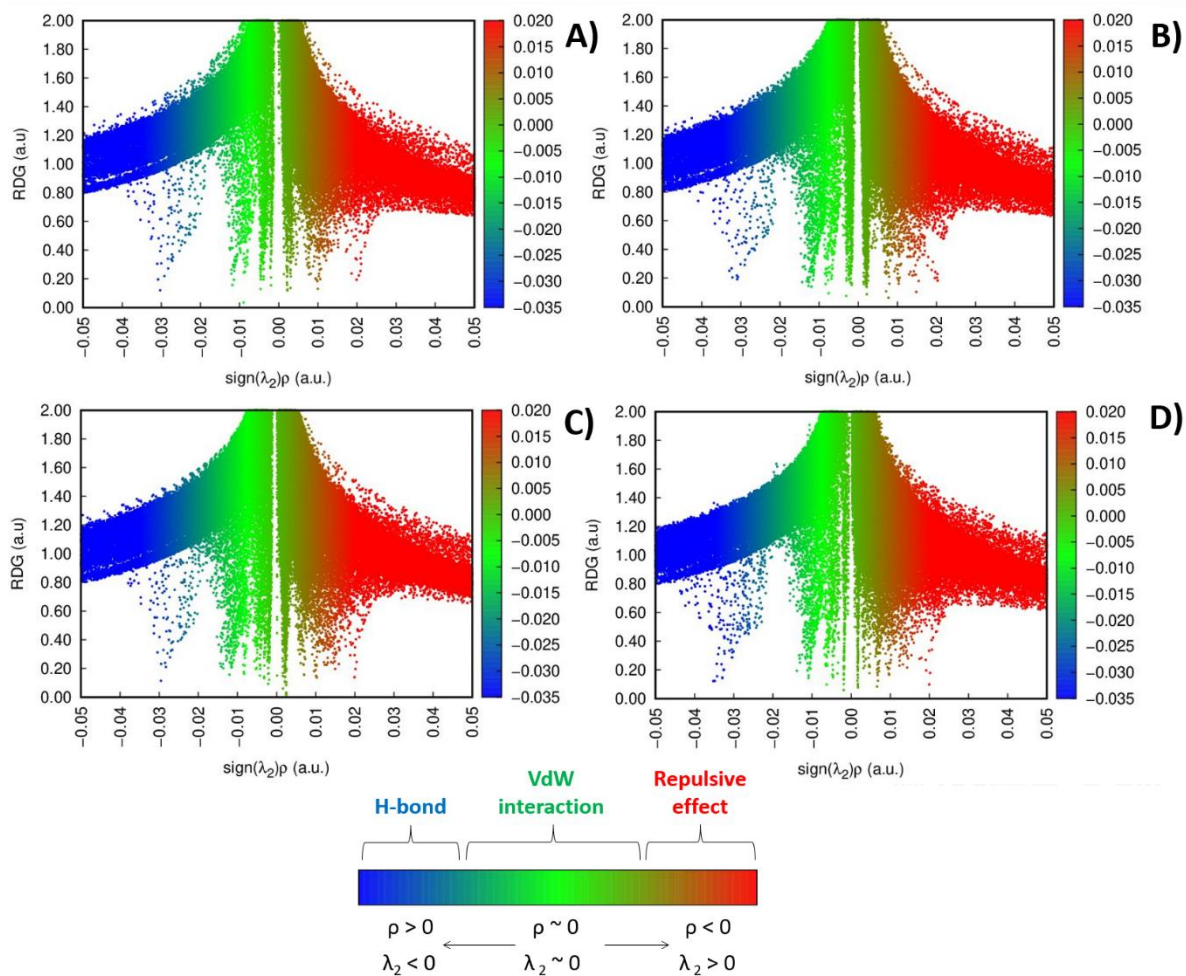

**Figure S24** 2D plots of RDG versus the electron density multiplied by the sign of the second Hessian eigenvalue for: ASyr:Lev (1:1) – CF; B) Syr:Lev (1:1) – TCM; C) Syr:Lev (1:1) – TCE; D) Syr:Lev (1:1) – TCeOH. The red area represents repulsive effects; blue area - H-bonding; green area - van der Waals interactions.

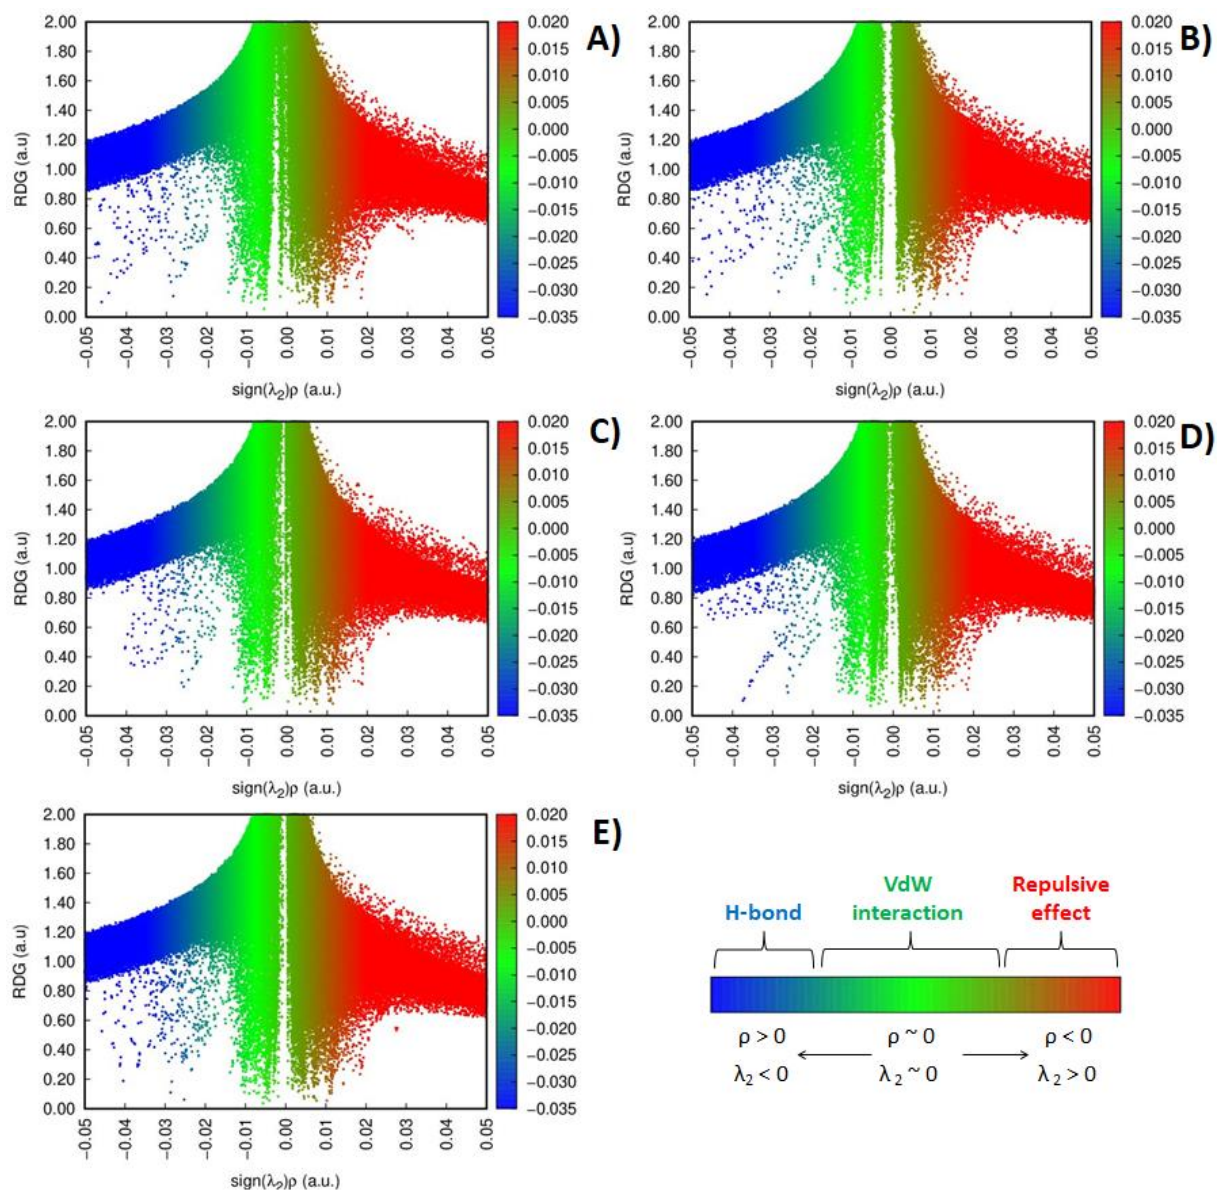

**Figure S25** 2D plots of RDG versus the electron density multiplied by the sign of the second Hessian eigenvalue for: A) C:Lev (1:2) – DCM; B) C:Lev (1:2)–CF; C) C:Lev (1:2)– TCM; D) C:Lev (1:2)– TCE; E) C:Lev (1:2)– TCeOH. The red area represents repulsive effects; blue area - H-bonding; green area -van der Waals interactions.

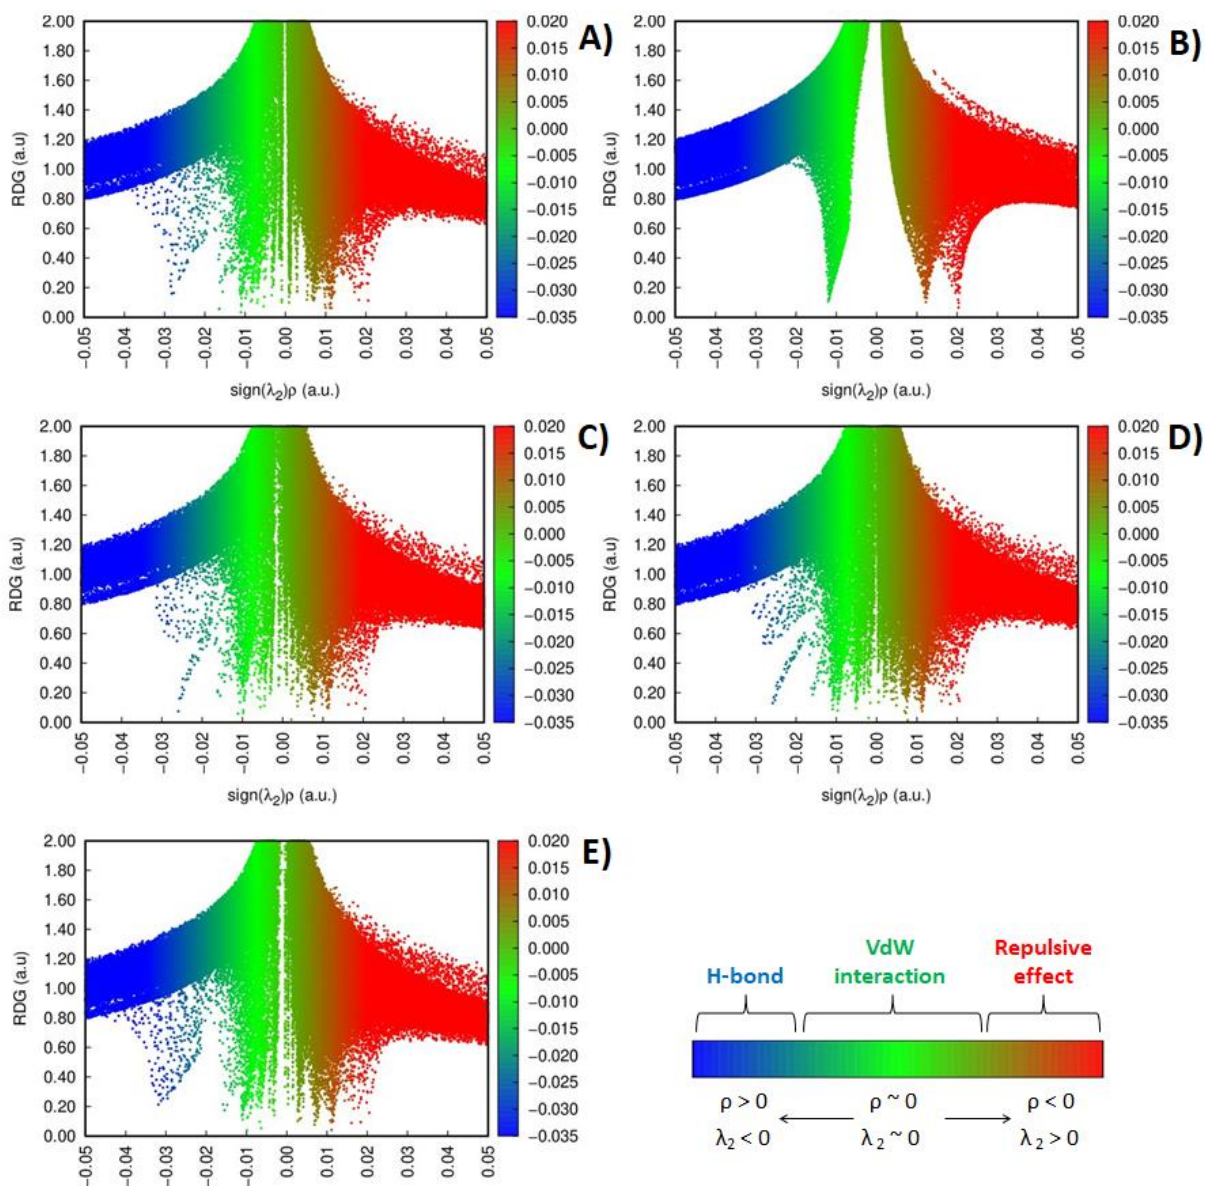

**Figure S26** 2D plots of RDG versus the electron density multiplied by the sign of the second Hessian eigenvalue for: A) C:Gu (1:1) – DCM; B) C:Gu (1:1) –CF; C) C:Gu (1:1) – TCM; D) C:Gu (1:1) – TCE; E) C:Gu (1:1) – TCeOH. The red area represents repulsive effects; blue area - H-bonding; green area -van der Waals interactions.



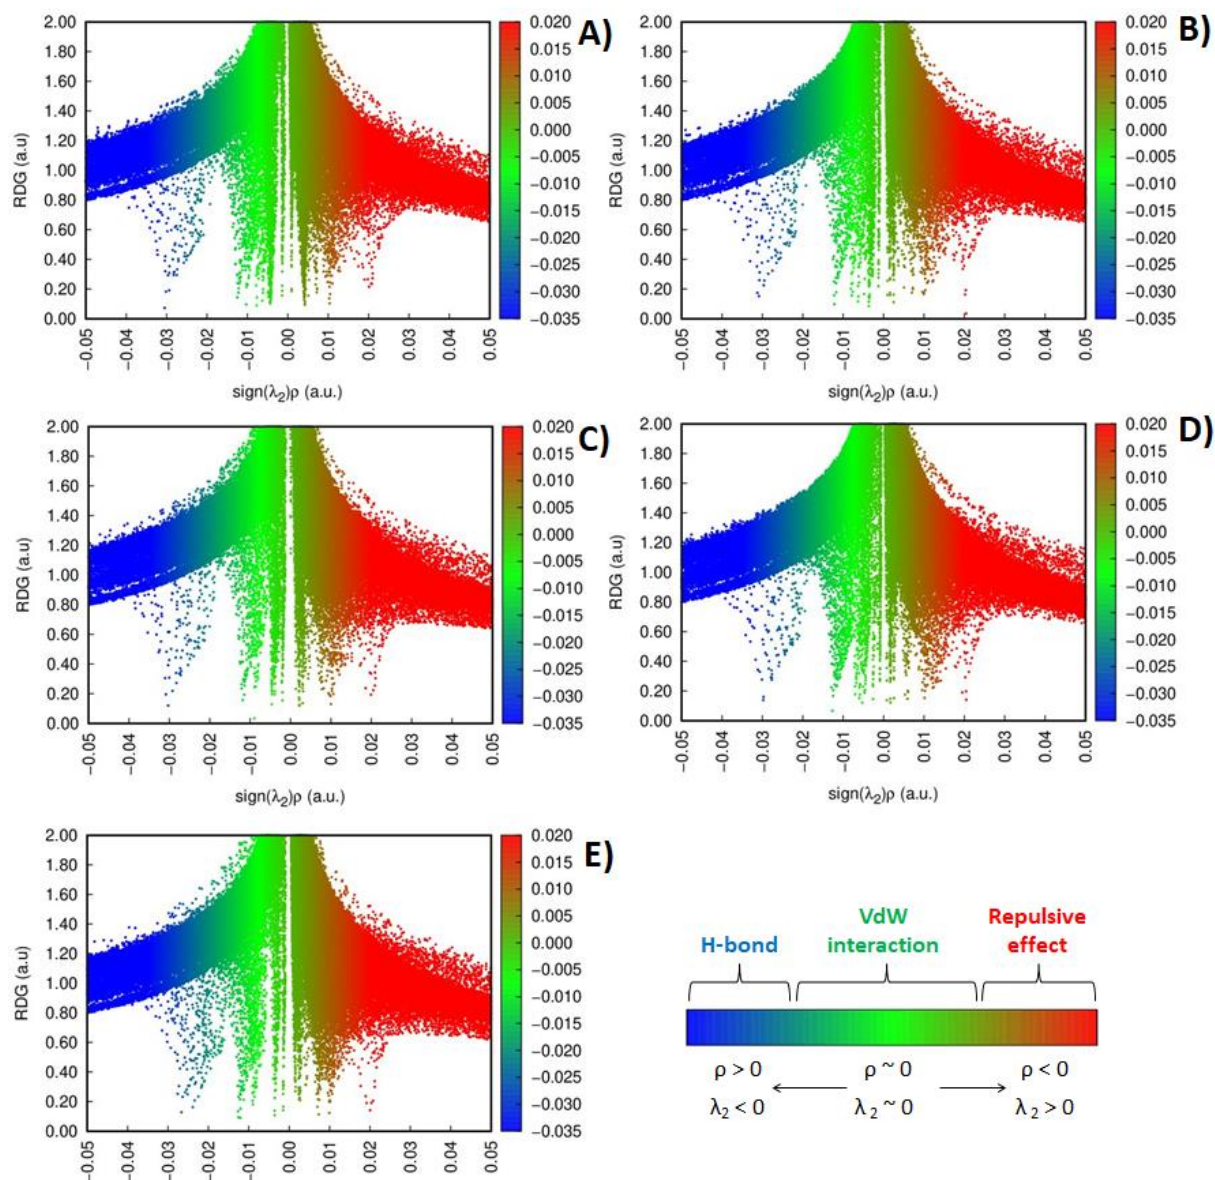

**Figure S27** 2D plots of RDG versus the electron density multiplied by the sign of the second Hessian eigenvalue for: A) G:Lev (1:1) – DCM; B) G:Lev (1:1) – CF; C) G:Lev (1:1) – TCM; D) G:Lev (1:1) – TCE; E) G:Lev (1:1) – TCeOH. The red area represents repulsive effects; blue area - H-bonding; green area -van der Waals interactions.

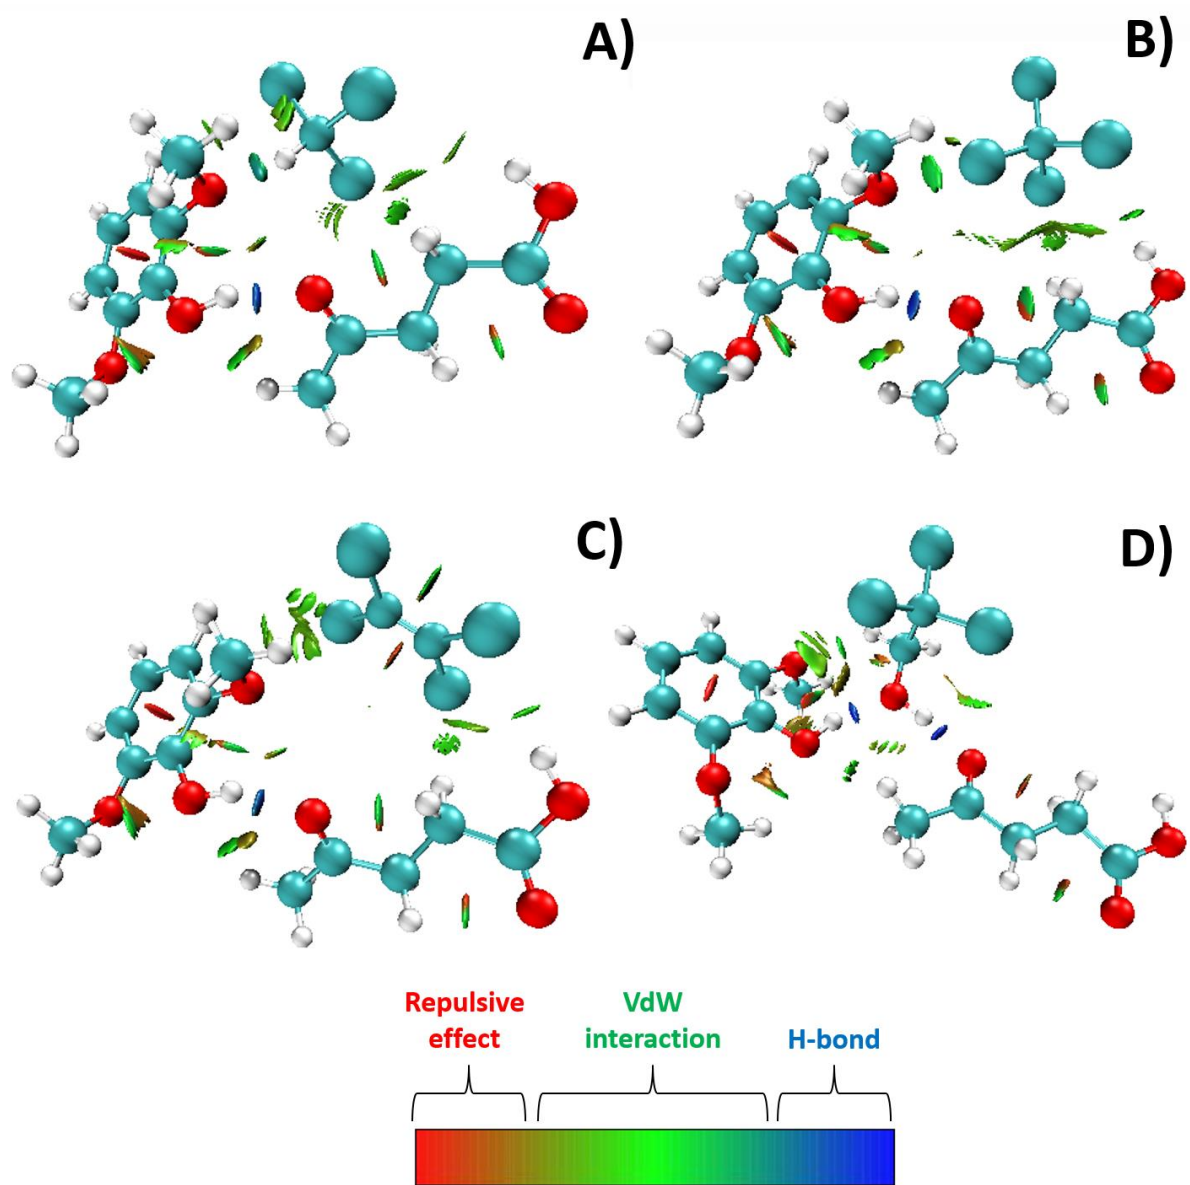

**Figure S28** Reduced density gradient (RDG) isosurfaces ( $s=0.5$  a.u.) of studied DES-VOX complexes: A) Syr:Lev (1:1) – CF; B) Syr:Lev (1:1) – TCM; C) Syr:Lev (1:1) – TCE; D) Syr:Lev (1:1) – TCEtOH. The red area represents repulsive effects; blue area - H-bonding; green area – van der Waals interactions.

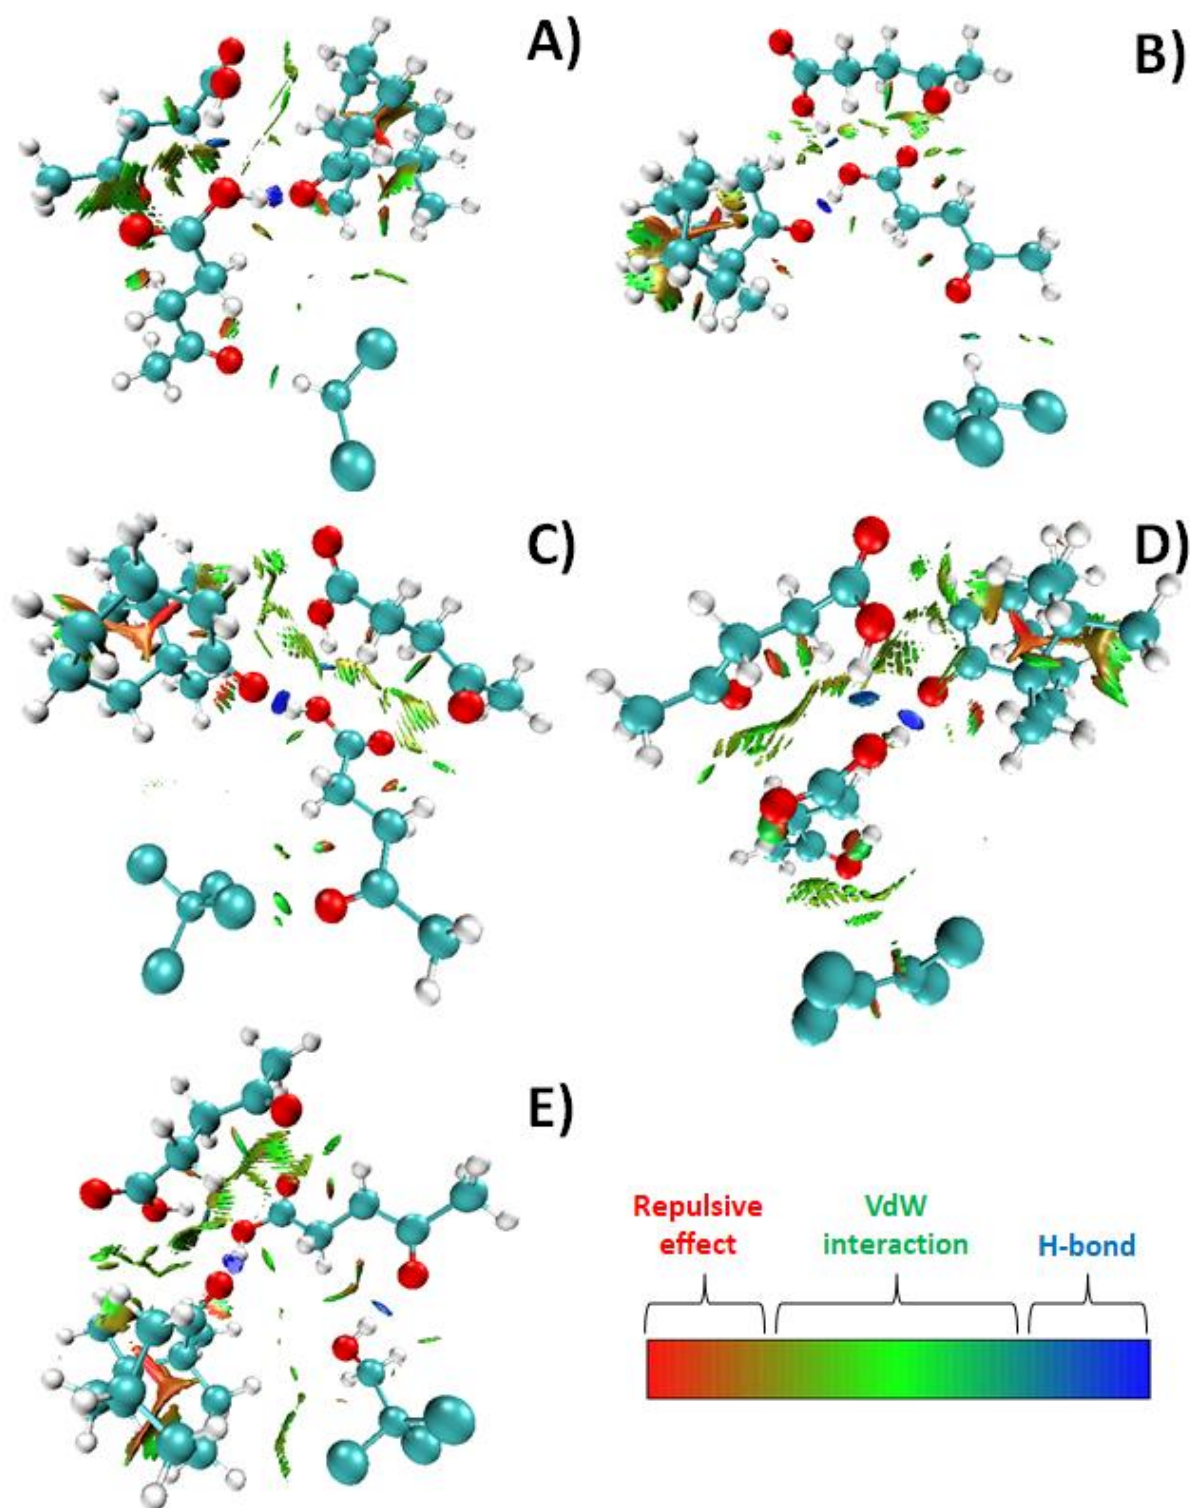

**Figure S29** Reduced density gradient (RDG) isosurfaces (s=0.5 a.u.) of studied DES-VOX complexes: A) C:Lev (1:2) – DCM; B) C:Lev (1:2)–CF; C) C:Lev (1:2)–TCM; D) C:Lev (1:2)–TCE; E) C:Lev (1:2)–TCEtOH. The red area represents repulsive effects; blue area - H-bonding; green area -van der Waals interactions.

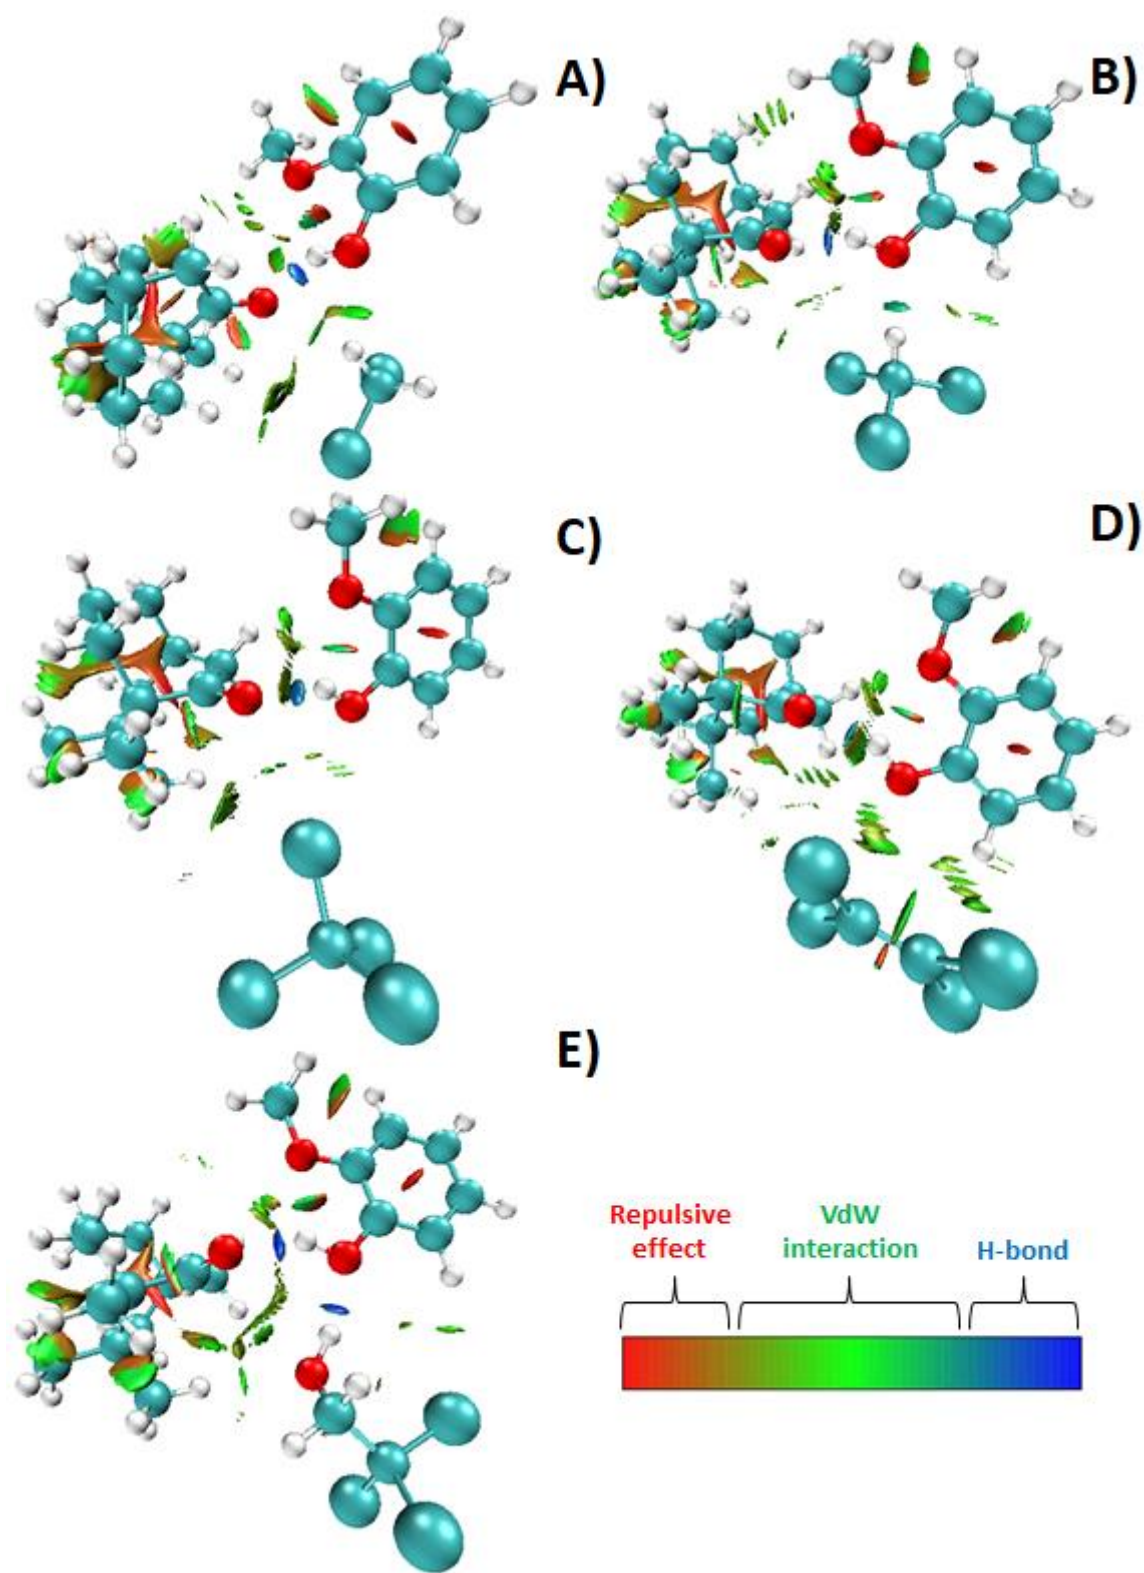

**Figure S30** Reduced density gradient (RDG) isosurfaces ( $s=0.5$  a.u.) of studied DES-VOX complexes: A) C:Gu (1:1) – DCM; B) C:Gu (1:1) –CF; C) C:Gu (1:1) – TCM; D) C:Gu (1:1) – TCE; E) C:Gu (1:1) – TCEtOH. The red area represents repulsive effects; blue area - H-bonding; green area -van der Waals interactions.

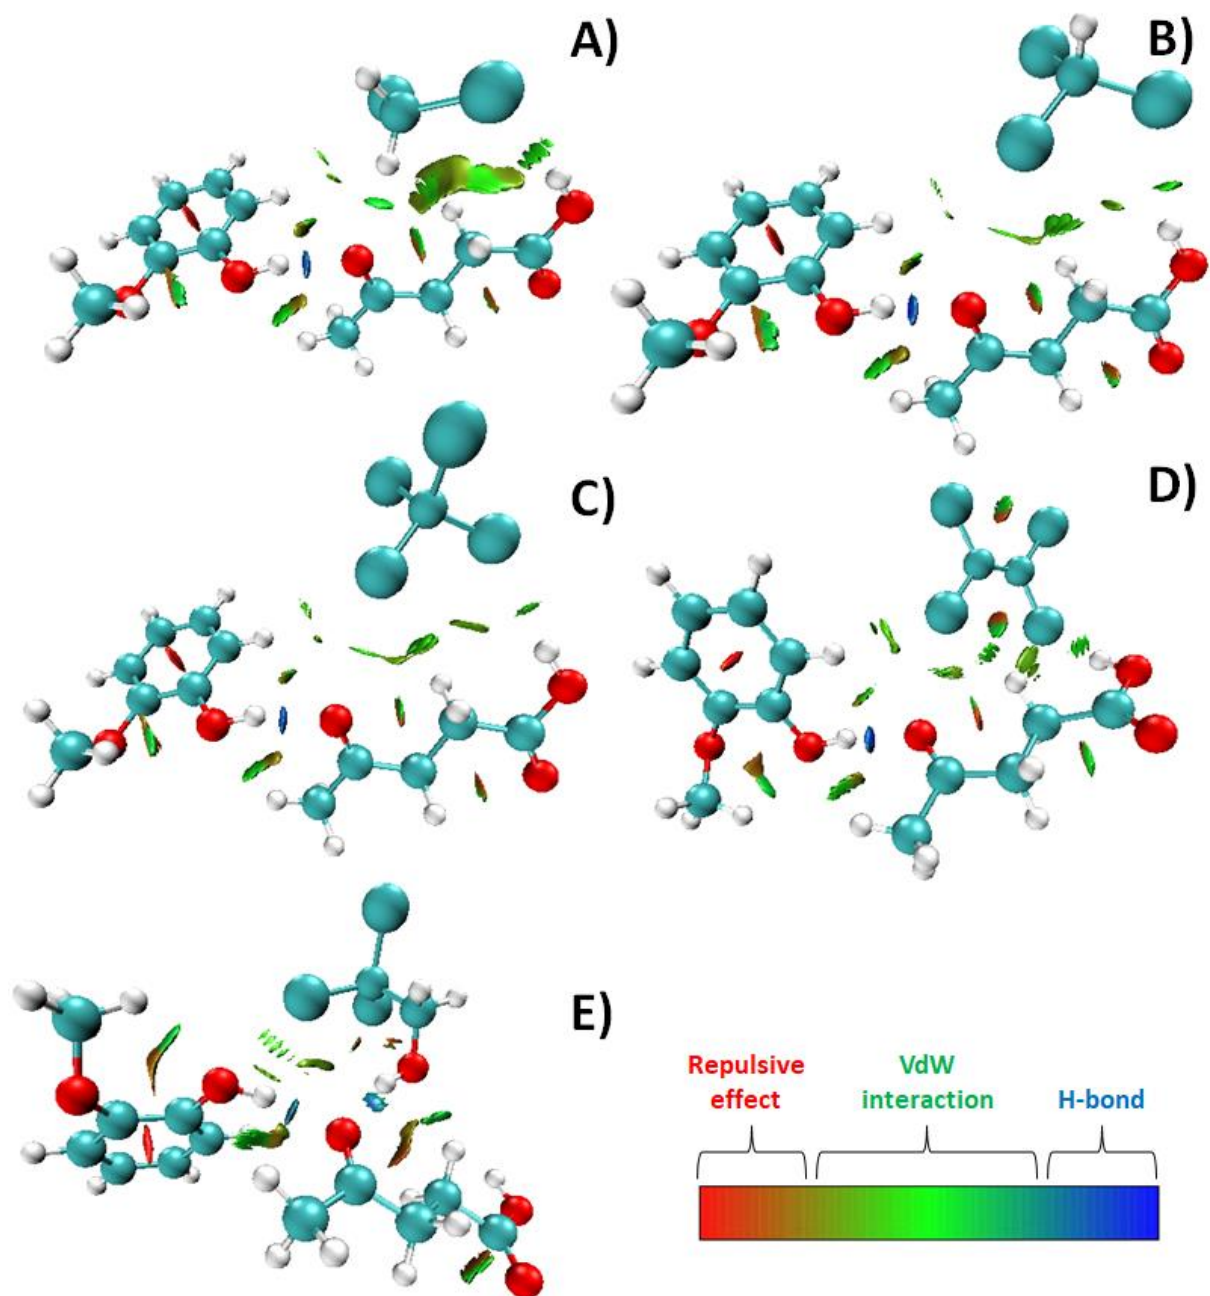

**Figure S31** Reduced density gradient (RDG) isosurfaces (s=0.5 a.u.) of studied DES-VOX complexes: A) G:Lev (1:1) – DCM; B) G:Lev (1:1) – CF; C) G:Lev (1:1) – TCM; D) G:Lev (1:1) – TCE; E) G:Lev (1:1) – TCeOH. The red area represents repulsive effects; blue area - H-bonding; green area -van der Waals interactions.

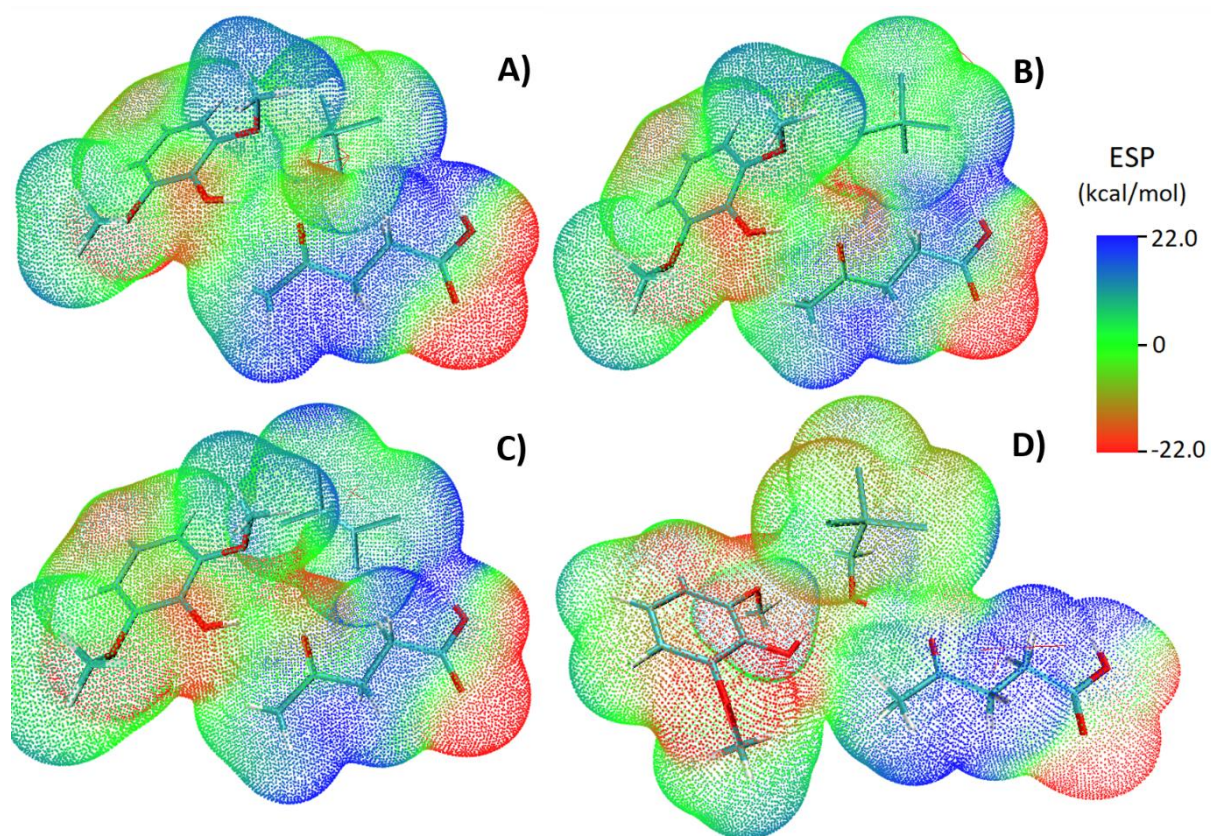

**Figure S32** Electrostatic potential (ESP) mapped on electron total density with an isovalue 0.001 for: A) Syr:Lev (1:1) – CF; B) Syr:Lev (1:1) – TCM; C) Syr:Lev (1:1) – TCE; D) Syr:Lev (1:1) – TCEtOH. Blue area are positively charged; red regions are negatively charged; green are neutrally charged.

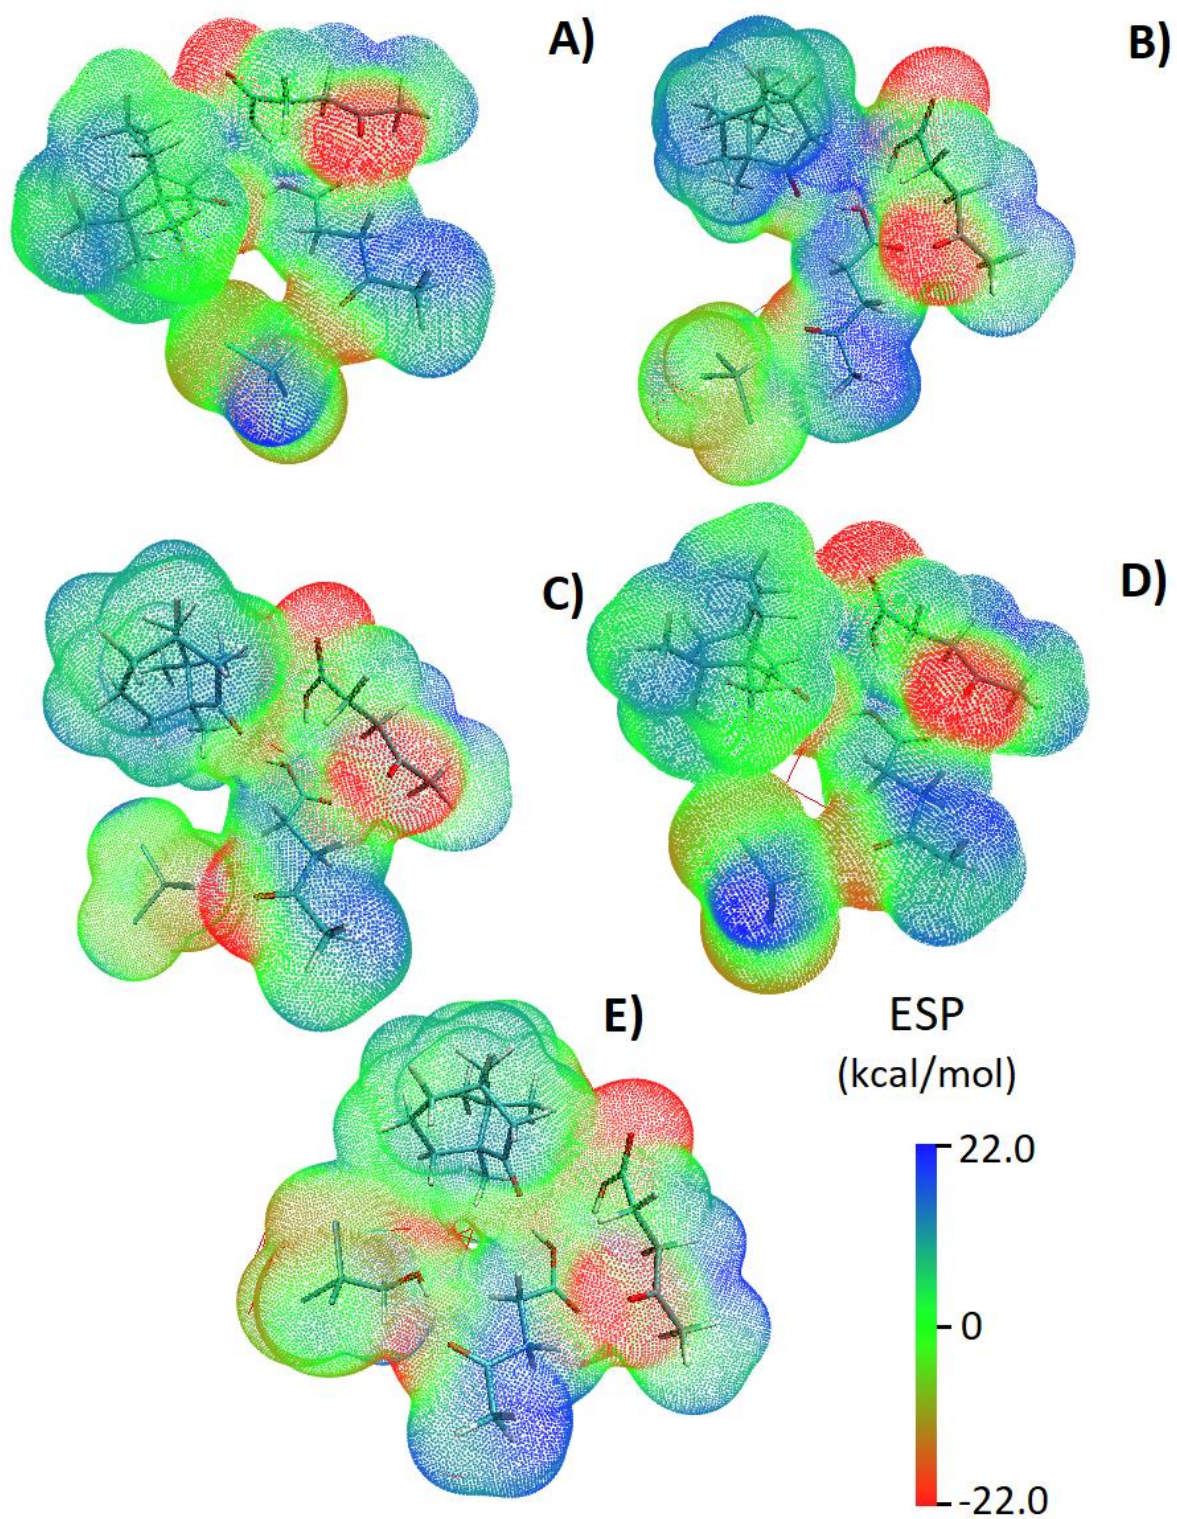

**Figure S33** Electrostatic potential (ESP) mapped on electron total density with an isovalue 0.001 for: A) C:Lev (1:2) – DCM; B) C:Lev (1:2)–CF; C) C:Lev (1:2)– TCM; D) C:Lev (1:2)– TCE; E) C:Lev (1:2)– TCeOH. Blue area are positively charged; red regions are negatively charged; green are neutrally charged.

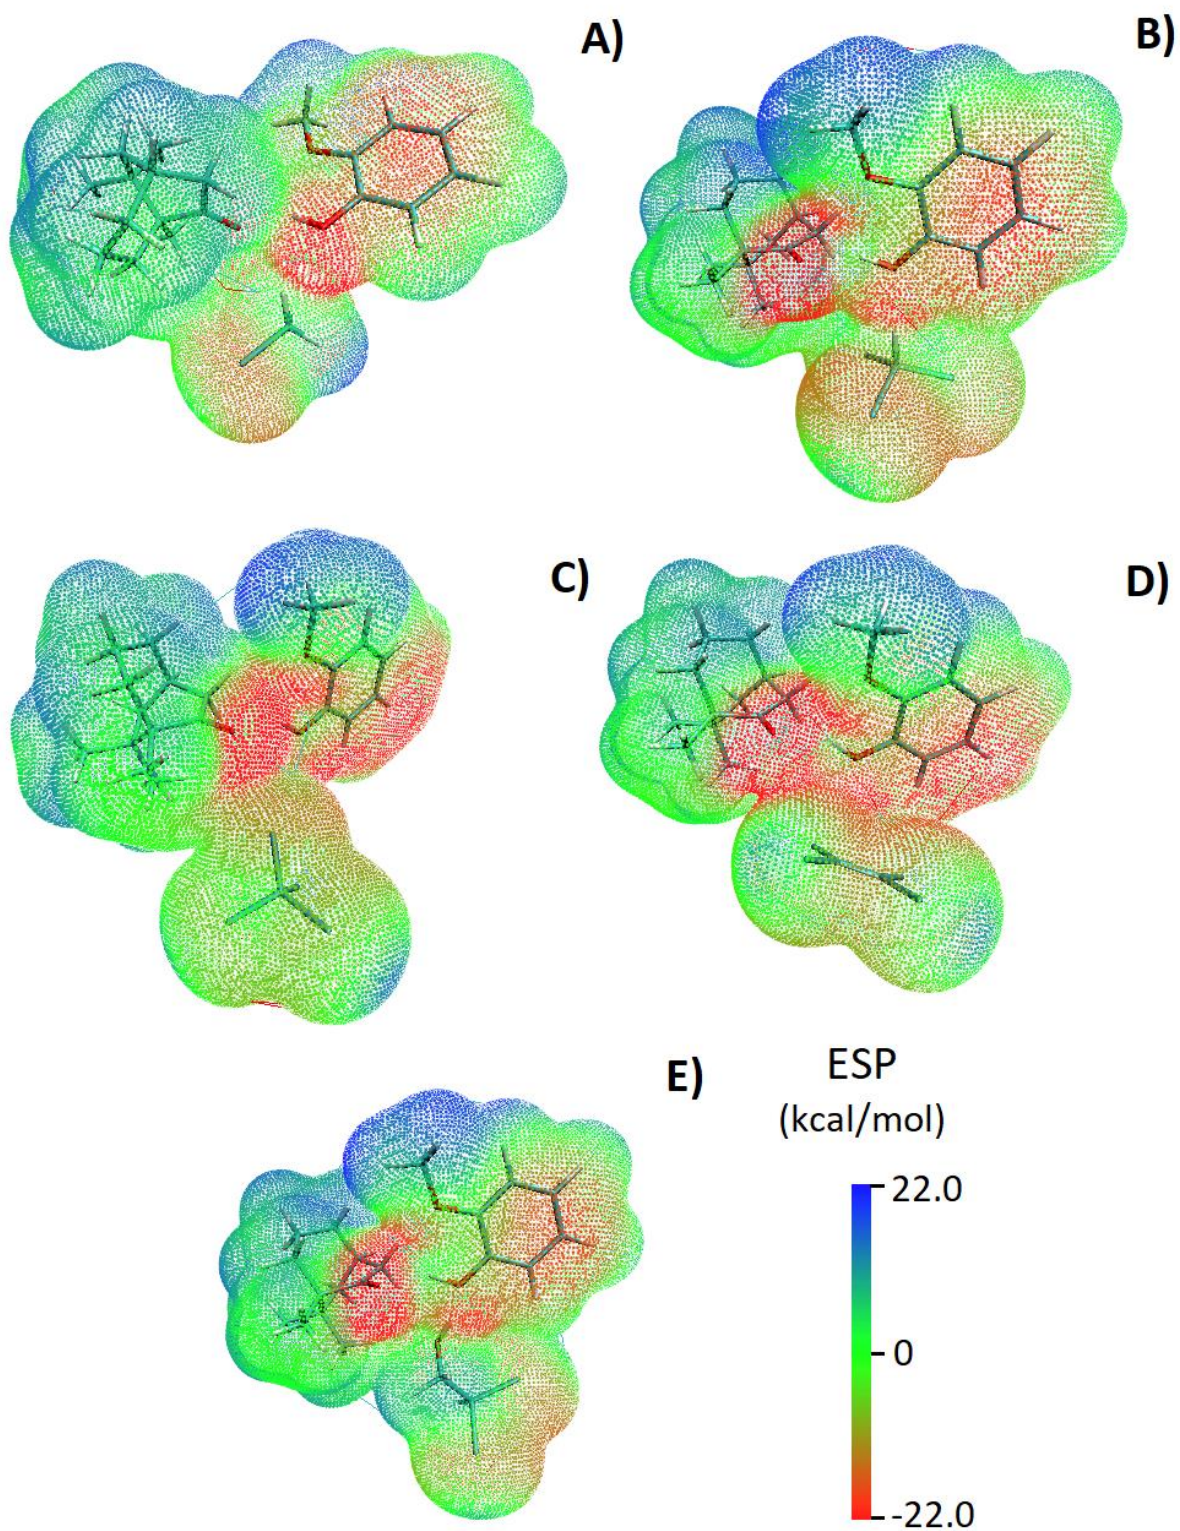

**Figure S34** Electrostatic potential (ESP) mapped on electron total density with an isovalue 0.001 for: A) C:Gu (1:1) – DCM; B) C:Gu (1:1) – CF; C) C:Gu (1:1)– TCM; D) C:Gu (1:1)– TCE; E) C:Gu (1:1)– TCEtOH. Blue area are positively charged; red regions are negatively charged; green are neutrally charged.



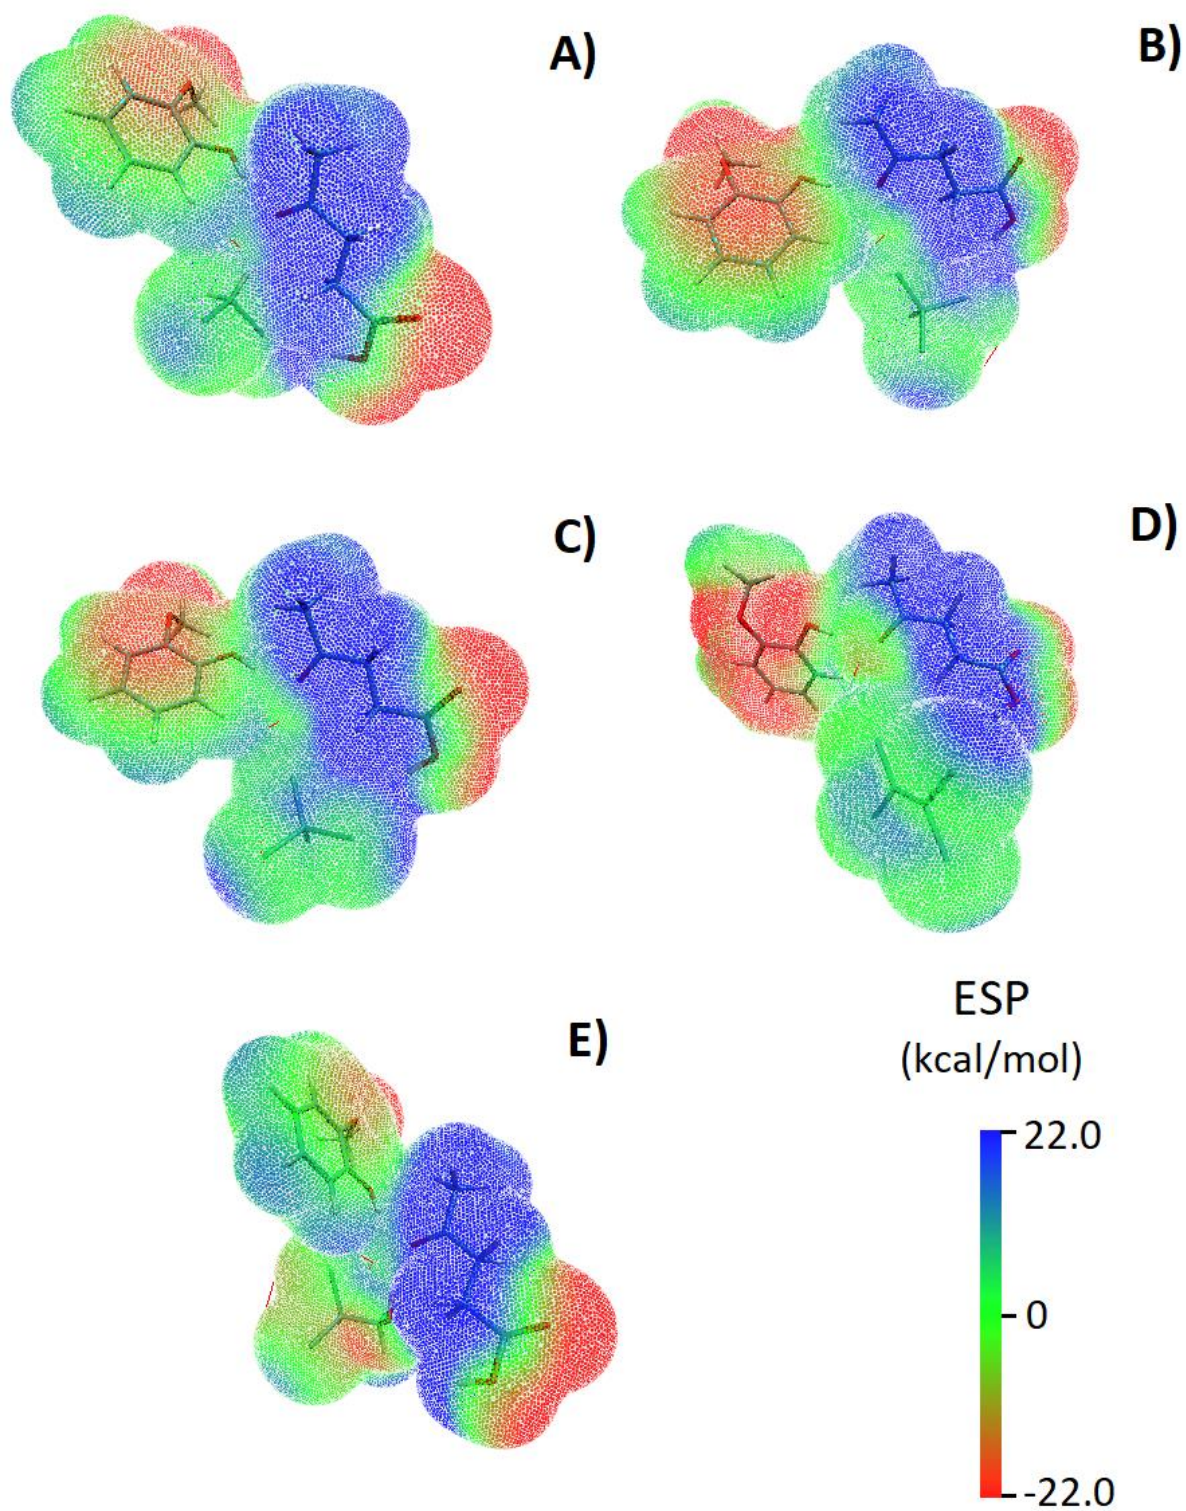

**Figure S35** Electrostatic potential (ESP) mapped on electron total density with an isovalue 0.001 for: A) G:Lev (1:1) – DCM; B) G:Lev (1:1) –CF; C) G:Lev (1:1) – TCM; D) G:Lev (1:1) – TCE; E) G:Lev (1:1) – TCEtOH. Blue area are positively charged; red regions are negatively charged; green are neutrally charged.

**Table S1** Comparison of the developed procedure of VOX absorption with other absorption or adsorption procedures.

| Sorbent type                | Type of VOX                       | Capacity [mg/g]                 | Gas type                                                                                          | Process conditions                                              | Sorbent price per 1 kg | Ref.         |
|-----------------------------|-----------------------------------|---------------------------------|---------------------------------------------------------------------------------------------------|-----------------------------------------------------------------|------------------------|--------------|
| <b>ChCl:U (1:2)</b>         | DCM                               | 0.2                             | air                                                                                               | Temperature: 30°C<br>Flow rate: n.d.<br>Pressure: n.d.          | 44.6 €                 | [1]          |
| <b>ChCl:EG (1:2)</b>        | DCM                               | 0.26                            | air                                                                                               | Temperature: 30°C<br>Flow rate: n.d.<br>Pressure: n.d.          | 37.5 €                 | [1]          |
| <b>ChCl:Gly (1:2)</b>       | DCM                               | 0.24                            | air                                                                                               | Temperature: 30°C<br>Flow rate: n.d.<br>Pressure: n.d.          | 40.1 €                 | [1]          |
| <b>ChCl:Lev (1:2)</b>       | DCM                               | 0.27                            | air                                                                                               | Temperature: 30°C<br>Flow rate: n.d.<br>Pressure: n.d.          | 42.5 €                 | [1]          |
| <b>TBPB:Gly (1:1)</b>       | DCM                               | 0.28                            | air                                                                                               | Temperature: 30°C<br>Flow rate: n.d.<br>Pressure: n.d.          | 199.9 €                | [1]          |
| <b>TBPB:Lev (1:6)</b>       | DCM                               | 0.29                            | air                                                                                               | Temperature: 30°C<br>Flow rate: n.d.<br>Pressure: n.d.          | 76.1 €                 | [1]          |
| <b>TBAB:DA (1:2)</b>        | DCM                               | 0.3                             | air                                                                                               | Temperature: 30°C<br>Flow rate: n.d.<br>Pressure: n.d.          | 320.5 €                | [1]          |
| <b>UiO-66</b>               | DCM                               | 510.3                           | air                                                                                               | Temperature: 25°C<br>Pressure: 44 kPa                           | 79207.20 €             | [2]          |
| <b>activated carbon</b>     | CF<br>DCM<br>CM                   | 213.4<br>123.9<br>22.2          | N <sub>2</sub>                                                                                    | Temperature: 35°C<br>Flow rate: 100 mL/min<br>Pressure: 1.5 atm | 12.16 €                | [3]          |
| <b>ZIF-8/graphene oxide</b> | DCM                               | 240.0                           | air                                                                                               | Temperature: 25°C<br>Flow rate: 20 ml/min.                      | 7689.0 €               | [4]          |
| <b>[Bmim][NTf2]</b>         | DCM                               | 100                             | air                                                                                               | Temperature: 30°C<br>Flow rate: n.d.<br>Pressure: 10 kPa        | 950 €                  | [5]          |
| <b>[Bmim][PF6]</b>          | DCM                               | 110                             | air                                                                                               | Temperature: 30°C<br>Flow rate: n.d.<br>Pressure: 10 kPa        | 2450.8 €               | [5]          |
| <b>[Bmim][BF4]</b>          | DCM                               | 130                             | air                                                                                               | Temperature: 30°C<br>Flow rate: n.d.<br>Pressure: 10 kPa        | 750 €                  | [5]          |
| <b>[Bmim][DCA]</b>          | DCM                               | 140                             | air                                                                                               | Temperature: 30°C<br>Flow rate: n.d.<br>Pressure: 10 kPa        | 2494.5 €               | [5]          |
| <b>[Bmim][SCN]</b>          | DCM                               | 150                             | air                                                                                               | Temperature: 30°C<br>Flow rate: n.d.<br>Pressure: 10 kPa        | 892.8 €                | [5]          |
| <b>[Emim][SCN]</b>          | DCM                               | 120                             | air                                                                                               | Temperature: 30°C<br>Flow rate: n.d.<br>Pressure: 10 kPa        | 4934                   | [5]          |
| <b>Gu:C:Lev (1:1:3)</b>     | DCM                               | 55                              | N <sub>2</sub>                                                                                    | Temperature: 25°C<br>Flow rate: 50 mL/min<br>Pressure: 10 kPa   | 29.0 €                 | [6]          |
| <b>Syr:Lev (1:1)</b>        | DCM<br>CF<br>TCM<br>TCE<br>TCEtOH | 304<br>420<br>360<br>292<br>661 | Biogas (58%<br>CH <sub>4</sub> , 38 CO <sub>2</sub> , 2%<br>H <sub>2</sub> O, 2% N <sub>2</sub> ) | Temperature: 25°C<br>Flow rate: 50 mL/min<br>Pressure: 10 kPa   | 263.5 €                | This studies |
| <b>C:Gu (1:1)</b>           | DCM<br>CF<br>TCM                  | 215<br>561.5<br>320             | Biogas (58%<br>CH <sub>4</sub> , 38 CO <sub>2</sub> , 2%<br>H <sub>2</sub> O, 2% N <sub>2</sub> ) | Temperature: 25°C<br>Flow rate: 50 mL/min<br>Pressure: 10 kPa   | 32.78 €                | This studies |

|                     |        |        |                                                                                                   |                                                               |         |              |
|---------------------|--------|--------|---------------------------------------------------------------------------------------------------|---------------------------------------------------------------|---------|--------------|
|                     | TCE    | 262.4  |                                                                                                   |                                                               |         |              |
|                     | TCEtOH | 275.3  |                                                                                                   |                                                               |         |              |
| <b>C:Lev (1:2)</b>  | DCM    | 181    | Biogas (58%<br>CH <sub>4</sub> , 38 CO <sub>2</sub> , 2%<br>H <sub>2</sub> O, 2% N <sub>2</sub> ) | Temperature: 25°C<br>Flow rate: 50 mL/min<br>Pressure: 10 kPa | 24.02 € | This studies |
|                     | CF     | 401.5  |                                                                                                   |                                                               |         |              |
|                     | TCM    | 143.5  |                                                                                                   |                                                               |         |              |
|                     | TCE    | 248    |                                                                                                   |                                                               |         |              |
|                     | TCEtOH | 198.15 |                                                                                                   |                                                               |         |              |
| <b>Gu:Lev (1:1)</b> | DCM    | 130.7  | Biogas (58%<br>CH <sub>4</sub> , 38 CO <sub>2</sub> , 2%<br>H <sub>2</sub> O, 2% N <sub>2</sub> ) | Temperature: 25°C<br>Flow rate: 50 mL/min<br>Pressure: 10 kPa | 36.01 € | This studies |
|                     | CF     | 399.5  |                                                                                                   |                                                               |         |              |
|                     | TCM    | 115.8  |                                                                                                   |                                                               |         |              |
|                     | TCE    | 154    |                                                                                                   |                                                               |         |              |
|                     | TCEtOH | 161.2  |                                                                                                   |                                                               |         |              |

**[Bmim][NTf2]** - 1-Butyl-3-methylimidazolium bis(trifluoromethylsulfonyl)imide; **[Bmim][PF6]** - 1-Butyl-3-methylimidazolium hexafluorophosphate; **[Bmim][BF4]** - 1-Butyl-3-methylimidazolium tetrafluoroborate; **[Bmim][DCA]** - 1-Butyl-3-methylimidazolium dicyanamide; **[Bmim][SCN]** - 1-Butyl-3-methylimidazolium thiocyanate; **[Emim][SCN]** - 1-Ethyl-3-methylimidazolium-thiocyanate; **ChCl** – choline chloride; **CM**- Chloromethane; **DA** – decanoic acid; **EG** – ethylene glycol; **Gly** – glycerol; **U** – urea; **UiO-66** - (Universitetet i Oslo) a metal organic framework; **TBAB** – tetrabutylammonium bromide; **TBPB** - tetrabutylphosphonium bromide

## References

- [1] L. Moura, T. Moufawad, M. Ferreira, H. Bricout, S. Tilloy, E. Monflier, M. F. Costa Gomes, D. Landy, S. Fourmentin, *Environ. Chem. Lett.* **2017**, *15*, 747–753.
- [2] L. Zhou, X. Zhang, Y. Chen, *Mater. Lett.* **2017**, *197*, 167–170.
- [3] J. Lemus, M. Martin-Martinez, J. Palomar, L. Gomez-Sainero, M. A. Gilarranz, J. J. Rodriguez, *Chem. Eng. J.* **2012**, *211–212*, 246–254.
- [4] Y. Zhou, L. Zhou, X. Zhang, Y. Chen, *Microporous Mesoporous Mater.* **2016**, *225*, 488–493.
- [5] W. Wu, T. Li, H. Gao, D. Shang, W. Tu, B. Wang, X. Zhang, *Guocheng Gongcheng Xuebao/The Chinese J. Process Eng.* **2019**, *19*, 173–180.
- [6] E. Stupek, P. Makoś, J. Gębicki, *Arch. Environ. Prot.* **2020**, *46*, 41–46.
